# Supplementary material for: Assessment of integrated watershed health based on the natural environment, hydrology, water quality, and aquatic ecology
Source: Copernicus journal article supplement (doi:10.5194/hess-21-5583-2017), 2017-11-14
Supplement: Supplementary file 1 [file hess-21-5583-2017-supplement.zip]

Archive with 3 entries (3 files):
- hess-21-5583-2017-supplement-title-page.pdf
- supplement1.pdf
- supplement2.pdf
