# Supplementary material for: Assessment of integrated watershed health based on the natural environment, hydrology, water quality, and aquatic ecology
Source: Copernicus journal article supplement (doi:10.5194/hess-21-5583-2017), 2017-11-14
Supplement: Supplementary file 1 [file hess-21-5583-2017-supplement.zip › hess-21-5583-2017-supplement-title-page.pdf]

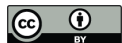

## *Supplement of*

# **Assessment of integrated watershed health based on the natural environment, hydrology, water quality, and aquatic ecology**

**So Ra Ahn and Seong Joon Kim**

*Correspondence to:* Seong Joon Kim ([kimsj@konkuk.ac.kr](mailto:kimsj@konkuk.ac.kr))

- [hess-21-5583-2017-supplement-title-page.pdf](#)
- [supplement1.pdf](#)
- [supplement2.pdf](#)

The copyright of individual parts of the supplement might differ from the CC BY 3.0 License.
