# Supplementary material for: Assessment of integrated watershed health based on the natural environment, hydrology, water quality, and aquatic ecology
Source: Copernicus journal article supplement (doi:10.5194/hess-21-5583-2017), 2017-11-14
Supplement: Supplementary file 1 [file hess-21-5583-2017-supplement.zip › supplement2.pdf]

## Dataset for Watershed Health Index

| No. | Standard watershed | Landscape |      |             | Stream geo-morphology | Hydrology |      |      |      |             | Water quality |      |      |             | Aquatic habitat |         |             | Biological |      |      |             | Watershed health index |
|-----|--------------------|-----------|------|-------------|-----------------------|-----------|------|------|------|-------------|---------------|------|------|-------------|-----------------|---------|-------------|------------|------|------|-------------|------------------------|
|     |                    | GA        | ARA  | Integration |                       | Total     | SP   | SWD  | GWD  | Integration | Sed.          | T-N  | T-P  | Integration | Connectivity    | Wetland | Integration | RDI        | BMI  | FAI  | Integration |                        |
| 1   | 100101             | 0.89      | 0.79 | <b>0.85</b> | <b>0.41</b>           | 0.95      | 0.97 | 0.60 | 0.76 | <b>1.00</b> | 0.01          | 0.96 | 0.25 | <b>0.31</b> | 0.00            | 0.59    | <b>0.36</b> | 0.81       | 0.94 | 0.97 | <b>0.97</b> | <b>0.94</b>            |
| 2   | 100102             | 0.86      | 0.58 | <b>0.69</b> | <b>0.68</b>           | 1.00      | 0.93 | 0.62 | 0.84 | <b>0.98</b> | 0.26          | 0.94 | 0.29 | <b>0.53</b> | 0.00            | 0.61    | <b>0.36</b> | 0.81       | 0.94 | 0.97 | <b>0.97</b> | <b>0.99</b>            |
| 3   | 100103             | 0.77      | 0.56 | <b>0.64</b> | <b>0.68</b>           | 0.96      | 0.64 | 0.93 | 0.99 | <b>0.97</b> | 0.12          | 0.13 | 0.49 | <b>0.07</b> | 0.00            | 0.69    | <b>0.40</b> | 0.79       | 0.79 | 0.91 | <b>0.87</b> | <b>0.86</b>            |
| 4   | 100104             | 0.68      | 0.73 | <b>0.73</b> | <b>0.22</b>           | 0.98      | 0.95 | 0.70 | 0.58 | <b>0.98</b> | 0.34          | 0.73 | 0.32 | <b>0.48</b> | 0.50            | 0.63    | <b>0.45</b> | 0.79       | 0.79 | 0.91 | <b>0.87</b> | <b>0.89</b>            |
| 5   | 100105             | 0.26      | 0.61 | <b>0.41</b> | <b>0.59</b>           | 0.95      | 0.92 | 0.92 | 0.86 | <b>0.99</b> | 0.17          | 0.14 | 0.42 | <b>0.06</b> | 0.00            | 0.57    | <b>0.33</b> | 0.21       | 0.72 | 0.18 | <b>0.35</b> | <b>0.34</b>            |
| 6   | 100106             | 0.92      | 0.94 | <b>0.95</b> | <b>0.77</b>           | 0.99      | 0.82 | 0.99 | 0.85 | <b>0.97</b> | 0.38          | 0.60 | 0.37 | <b>0.44</b> | 0.00            | 0.42    | <b>0.22</b> | 0.46       | 0.74 | 0.91 | <b>0.70</b> | <b>0.97</b>            |
| 7   | 100107             | 0.68      | 0.39 | <b>0.47</b> | <b>0.12</b>           | 1.00      | 0.99 | 0.61 | 0.49 | <b>1.00</b> | 0.36          | 0.74 | 0.33 | <b>0.49</b> | 0.43            | 0.40    | <b>0.29</b> | 0.69       | 0.86 | 0.88 | <b>0.86</b> | <b>0.64</b>            |
| 8   | 100108             | 0.80      | 0.63 | <b>0.70</b> | <b>0.89</b>           | 0.97      | 0.63 | 0.98 | 0.97 | <b>0.96</b> | 0.06          | 0.44 | 0.42 | <b>0.11</b> | 0.00            | 0.86    | <b>0.61</b> | 0.54       | 0.96 | 0.82 | <b>0.81</b> | <b>0.97</b>            |
| 9   | 100109             | 0.93      | 0.92 | <b>0.94</b> | <b>0.81</b>           | 0.97      | 0.66 | 1.00 | 0.85 | <b>0.97</b> | 0.39          | 0.60 | 0.43 | <b>0.49</b> | 0.44            | 0.51    | <b>0.37</b> | 0.17       | 0.84 | 0.76 | <b>0.57</b> | <b>0.98</b>            |
| 10  | 100110             | 0.57      | 0.67 | <b>0.66</b> | <b>0.33</b>           | 0.21      | 0.85 | 0.29 | 0.30 | <b>0.81</b> | 0.03          | 0.18 | 0.35 | <b>0.01</b> | 0.00            | 0.36    | <b>0.20</b> | 0.78       | 0.92 | 0.84 | <b>0.89</b> | <b>0.44</b>            |
| 11  | 100111             | 0.79      | 0.59 | <b>0.68</b> | <b>0.47</b>           | 0.23      | 0.90 | 0.08 | 0.21 | <b>0.82</b> | 0.29          | 0.86 | 0.34 | <b>0.53</b> | 0.00            | 0.29    | <b>0.17</b> | 0.78       | 0.92 | 0.84 | <b>0.89</b> | <b>0.82</b>            |
| 12  | 100112             | 0.73      | 0.88 | <b>0.86</b> | <b>0.69</b>           | 0.22      | 0.86 | 0.22 | 0.26 | <b>0.79</b> | 0.35          | 0.71 | 0.25 | <b>0.40</b> | 0.00            | 0.50    | <b>0.27</b> | 0.95       | 0.88 | 0.87 | <b>0.95</b> | <b>0.97</b>            |
| 13  | 100113             | 0.71      | 0.81 | <b>0.81</b> | <b>0.36</b>           | 0.19      | 0.70 | 0.64 | 0.46 | <b>0.65</b> | 0.03          | 0.76 | 0.40 | <b>0.28</b> | 0.00            | 0.33    | <b>0.19</b> | 0.86       | 0.44 | 0.41 | <b>0.54</b> | <b>0.42</b>            |
| 14  | 100114             | 0.85      | 0.78 | <b>0.83</b> | <b>0.35</b>           | 0.20      | 0.83 | 0.34 | 0.34 | <b>0.80</b> | 0.28          | 0.99 | 0.35 | <b>0.61</b> | 0.00            | 0.50    | <b>0.28</b> | 0.86       | 0.81 | 0.94 | <b>0.92</b> | <b>0.92</b>            |
| 15  | 100115             | 0.66      | 0.46 | <b>0.51</b> | <b>0.26</b>           | 0.24      | 0.79 | 0.36 | 0.39 | <b>0.73</b> | 0.10          | 0.76 | 0.39 | <b>0.34</b> | 0.00            | 0.00    | <b>0.00</b> | 0.98       | 0.66 | 0.63 | <b>0.77</b> | <b>0.27</b>            |
| 16  | 100116             | 0.52      | 0.89 | <b>0.79</b> | <b>0.53</b>           | 0.21      | 0.79 | 0.37 | 0.39 | <b>0.73</b> | 0.06          | 0.77 | 0.41 | <b>0.34</b> | 0.00            | 0.55    | <b>0.32</b> | 0.95       | 0.80 | 0.81 | <b>0.89</b> | <b>0.83</b>            |
| 17  | 100117             | 0.74      | 0.69 | <b>0.72</b> | <b>0.64</b>           | 0.25      | 0.88 | 0.16 | 0.19 | <b>0.78</b> | 0.32          | 0.80 | 0.20 | <b>0.41</b> | 0.00            | 0.82    | <b>0.57</b> | 0.98       | 0.66 | 0.63 | <b>0.77</b> | <b>0.94</b>            |
| 18  | 100201             | 0.78      | 0.57 | <b>0.66</b> | <b>0.93</b>           | 0.97      | 0.61 | 0.99 | 0.95 | <b>0.96</b> | 0.05          | 0.43 | 0.41 | <b>0.10</b> | 0.46            | 0.34    | <b>0.28</b> | 0.69       | 0.98 | 0.72 | <b>0.83</b> | <b>0.91</b>            |
| 19  | 100202             | 0.70      | 0.53 | <b>0.60</b> | <b>0.58</b>           | 0.96      | 0.67 | 1.00 | 0.87 | <b>0.95</b> | 0.30          | 0.56 | 0.42 | <b>0.36</b> | 0.00            | 0.25    | <b>0.17</b> | 0.19       | 0.95 | 0.54 | <b>0.53</b> | <b>0.62</b>            |
| 20  | 100203             | 0.60      | 0.43 | <b>0.49</b> | <b>0.54</b>           | 0.98      | 0.95 | 0.91 | 0.38 | <b>0.99</b> | 0.32          | 0.59 | 0.40 | <b>0.40</b> | 0.00            | 0.48    | <b>0.25</b> | 0.23       | 0.83 | 0.76 | <b>0.58</b> | <b>0.67</b>            |
| 21  | 100204             | 0.75      | 0.67 | <b>0.72</b> | <b>0.34</b>           | 0.19      | 0.50 | 0.53 | 0.68 | <b>0.45</b> | 0.15          | 0.42 | 0.56 | <b>0.23</b> | 0.49            | 0.61    | <b>0.44</b> | 0.23       | 0.83 | 0.76 | <b>0.58</b> | <b>0.35</b>            |
| 22  | 100205             | 0.54      | 0.29 | <b>0.39</b> | <b>0.18</b>           | 0.26      | 0.81 | 0.13 | 0.33 | <b>0.62</b> | 0.38          | 0.57 | 0.36 | <b>0.39</b> | 0.00            | 0.79    | <b>0.54</b> | 0.49       | 0.69 | 0.79 | <b>0.65</b> | <b>0.37</b>            |
| 23  | 100206             | 0.67      | 0.69 | <b>0.70</b> | <b>0.79</b>           | 0.25      | 0.84 | 0.22 | 0.34 | <b>0.76</b> | 0.34          | 0.77 | 0.29 | <b>0.48</b> | 0.40            | 0.55    | <b>0.38</b> | 0.61       | 0.81 | 0.82 | <b>0.75</b> | <b>0.93</b>            |
| 24  | 100207             | 0.34      | 0.23 | <b>0.28</b> | <b>0.45</b>           | 0.30      | 0.55 | 0.53 | 0.89 | <b>0.65</b> | 0.71          | 0.07 | 0.56 | <b>0.43</b> | 0.74            | 0.44    | <b>0.59</b> | 0.64       | 0.95 | 0.89 | <b>0.86</b> | <b>0.68</b>            |
| 25  | 100208             | 0.72      | 0.47 | <b>0.53</b> | <b>0.76</b>           | 0.29      | 0.24 | 0.93 | 0.71 | <b>0.48</b> | 0.67          | 0.63 | 0.64 | <b>0.79</b> | 0.58            | 0.28    | <b>0.39</b> | 0.53       | 0.90 | 0.86 | <b>0.79</b> | <b>0.90</b>            |
| 26  | 100209             | 0.92      | 0.80 | <b>0.86</b> | <b>0.84</b>           | 0.92      | 0.58 | 0.47 | 0.87 | <b>0.77</b> | 0.73          | 0.70 | 0.57 | <b>0.81</b> | 0.46            | 0.43    | <b>0.34</b> | 0.37       | 0.75 | 0.85 | <b>0.66</b> | <b>1.00</b>            |
| 27  | 100210             | 0.36      | 0.36 | <b>0.36</b> | <b>0.25</b>           | 0.85      | 0.89 | 0.06 | 0.52 | <b>0.90</b> | 0.46          | 0.81 | 0.52 | <b>0.72</b> | 0.65            | 0.94    | <b>0.81</b> | 0.68       | 0.90 | 0.61 | <b>0.74</b> | <b>0.92</b>            |
| 28  | 100211             | 0.28      | 0.45 | <b>0.35</b> | <b>0.37</b>           | 0.91      | 0.99 | 0.01 | 0.09 | <b>0.93</b> | 0.26          | 0.66 | 0.31 | <b>0.33</b> | 0.87            | 0.79    | <b>0.83</b> | 1.00       | 0.51 | 0.56 | <b>0.68</b> | <b>0.78</b>            |
| 29  | 100212             | 0.83      | 0.47 | <b>0.57</b> | <b>0.30</b>           | 0.24      | 0.89 | 0.05 | 0.35 | <b>0.83</b> | 0.02          | 0.99 | 0.30 | <b>0.40</b> | 0.53            | 0.74    | <b>0.60</b> | 0.92       | 0.70 | 0.68 | <b>0.80</b> | <b>0.78</b>            |
| 30  | 100213             | 0.46      | 0.63 | <b>0.56</b> | <b>0.21</b>           | 0.28      | 0.94 | 0.02 | 0.26 | <b>0.89</b> | 0.25          | 0.78 | 0.26 | <b>0.38</b> | 0.64            | 0.87    | <b>0.72</b> | 0.83       | 0.84 | 0.75 | <b>0.85</b> | <b>0.85</b>            |
| 31  | 100301             | 0.78      | 0.72 | <b>0.75</b> | <b>0.06</b>           | 0.25      | 0.89 | 0.07 | 0.18 | <b>0.78</b> | 0.31          | 0.84 | 0.23 | <b>0.46</b> | 0.00            | 0.96    | <b>0.80</b> | 0.84       | 0.87 | 0.52 | <b>0.75</b> | <b>0.85</b>            |
| 32  | 100302             | 0.96      | 0.96 | <b>0.97</b> | <b>0.56</b>           | 0.26      | 0.75 | 0.09 | 0.60 | <b>0.61</b> | 0.09          | 0.91 | 0.43 | <b>0.50</b> | 0.00            | 0.00    | <b>0.00</b> | 0.90       | 0.96 | 0.85 | <b>0.95</b> | <b>0.83</b>            |

| No. | Standard watershed | Landscape |      |             | Stream geo-morphology | Hydrology |      |      |      |             | Water quality |      |      |             | Aquatic habitat |         |             | Biological |      |      |             | Watershed health index |
|-----|--------------------|-----------|------|-------------|-----------------------|-----------|------|------|------|-------------|---------------|------|------|-------------|-----------------|---------|-------------|------------|------|------|-------------|------------------------|
|     |                    | GA        | ARA  | Integration |                       | Total     | SP   | SWD  | GWD  | Integration | Sed.          | T-N  | T-P  | Integration | Connectivity    | Wetland | Integration | RDI        | BMI  | FAI  | Integration |                        |
| 33  | 100303             | 0.90      | 0.76 | <b>0.84</b> | <b>0.48</b>           | 0.27      | 0.78 | 0.13 | 0.51 | <b>0.67</b> | 0.23          | 0.98 | 0.39 | <b>0.58</b> | 0.00            | 0.49    | <b>0.26</b> | 0.85       | 0.85 | 0.61 | <b>0.81</b> | <b>0.86</b>            |
| 34  | 100304             | 1.00      | 0.99 | <b>1.00</b> | <b>0.30</b>           | 0.28      | 0.35 | 0.21 | 0.79 | <b>0.26</b> | 0.65          | 0.33 | 0.70 | <b>0.66</b> | 0.00            | 0.00    | <b>0.00</b> | 0.76       | 0.85 | 0.67 | <b>0.78</b> | <b>0.50</b>            |
| 35  | 100305             | 0.86      | 0.64 | <b>0.72</b> | <b>0.59</b>           | 0.22      | 0.62 | 0.33 | 0.67 | <b>0.56</b> | 0.39          | 0.87 | 0.44 | <b>0.67</b> | 0.00            | 0.43    | <b>0.22</b> | 0.60       | 0.91 | 0.58 | <b>0.69</b> | <b>0.76</b>            |
| 36  | 100306             | 0.80      | 0.89 | <b>0.89</b> | <b>0.55</b>           | 0.23      | 0.77 | 0.20 | 0.51 | <b>0.67</b> | 0.36          | 0.87 | 0.23 | <b>0.52</b> | 0.00            | 0.54    | <b>0.31</b> | 0.77       | 0.75 | 0.59 | <b>0.70</b> | <b>0.86</b>            |
| 37  | 100307             | 0.64      | 0.83 | <b>0.80</b> | <b>0.83</b>           | 0.27      | 0.90 | 0.07 | 0.23 | <b>0.82</b> | 0.05          | 0.89 | 0.21 | <b>0.25</b> | 0.56            | 0.23    | <b>0.35</b> | 0.99       | 0.68 | 0.59 | <b>0.78</b> | <b>0.93</b>            |
| 38  | 100308             | 0.37      | 0.53 | <b>0.43</b> | <b>0.53</b>           | 0.89      | 0.97 | 0.02 | 0.29 | <b>0.93</b> | 0.02          | 0.67 | 0.31 | <b>0.16</b> | 0.88            | 0.75    | <b>0.83</b> | 0.62       | 0.57 | 0.58 | <b>0.57</b> | <b>0.75</b>            |
| 39  | 100309             | 0.75      | 0.58 | <b>0.65</b> | <b>0.58</b>           | 0.20      | 0.59 | 0.39 | 0.59 | <b>0.51</b> | 0.16          | 0.93 | 0.53 | <b>0.61</b> | 0.00            | 0.71    | <b>0.44</b> | 0.60       | 0.70 | 0.69 | <b>0.67</b> | <b>0.77</b>            |
| 40  | 100310             | 0.63      | 0.87 | <b>0.83</b> | <b>0.23</b>           | 0.22      | 0.82 | 0.19 | 0.36 | <b>0.71</b> | 0.28          | 0.90 | 0.18 | <b>0.45</b> | 0.44            | 0.95    | <b>0.83</b> | 0.72       | 0.76 | 0.94 | <b>0.84</b> | <b>0.94</b>            |
| 41  | 100311             | 0.88      | 0.90 | <b>0.90</b> | <b>0.27</b>           | 0.11      | 0.26 | 0.61 | 0.66 | <b>0.23</b> | 0.33          | 0.97 | 0.82 | <b>0.87</b> | 0.00            | 0.80    | <b>0.55</b> | 0.53       | 0.67 | 0.56 | <b>0.56</b> | <b>0.72</b>            |
| 42  | 100312             | 0.48      | 0.61 | <b>0.55</b> | <b>0.06</b>           | 0.93      | 0.75 | 0.40 | 0.70 | <b>0.86</b> | 0.34          | 0.92 | 0.20 | <b>0.51</b> | 0.73            | 0.90    | <b>0.79</b> | 0.72       | 0.76 | 0.94 | <b>0.84</b> | <b>0.83</b>            |
| 43  | 100313             | 0.74      | 0.39 | <b>0.49</b> | <b>0.67</b>           | 0.75      | 0.47 | 0.92 | 0.73 | <b>0.67</b> | 0.20          | 0.87 | 0.58 | <b>0.63</b> | 0.61            | 0.42    | <b>0.47</b> | 0.52       | 0.67 | 0.56 | <b>0.56</b> | <b>0.78</b>            |
| 44  | 100314             | 0.19      | 0.12 | <b>0.14</b> | <b>0.52</b>           | 0.71      | 0.80 | 0.11 | 0.84 | <b>0.88</b> | 0.62          | 0.25 | 0.36 | <b>0.31</b> | 0.99            | 0.32    | <b>0.96</b> | 0.57       | 0.42 | 0.39 | <b>0.43</b> | <b>0.66</b>            |
| 45  | 100315             | 0.40      | 0.57 | <b>0.46</b> | <b>0.05</b>           | 0.72      | 0.47 | 0.56 | 0.94 | <b>0.74</b> | 0.64          | 0.69 | 0.51 | <b>0.74</b> | 0.72            | 0.46    | <b>0.56</b> | 0.47       | 0.53 | 0.42 | <b>0.44</b> | <b>0.50</b>            |
| 46  | 100316             | 0.58      | 0.54 | <b>0.56</b> | <b>0.57</b>           | 0.68      | 0.32 | 0.98 | 0.66 | <b>0.58</b> | 0.31          | 0.89 | 0.83 | <b>0.81</b> | 0.83            | 0.30    | <b>0.69</b> | 0.63       | 0.92 | 0.61 | <b>0.73</b> | <b>0.96</b>            |
| 47  | 100317             | 0.56      | 0.83 | <b>0.78</b> | <b>0.44</b>           | 0.18      | 0.80 | 0.05 | 0.23 | <b>0.50</b> | 0.10          | 0.45 | 0.40 | <b>0.13</b> | 0.64            | 0.00    | <b>0.41</b> | 0.71       | 0.82 | 0.71 | <b>0.76</b> | <b>0.53</b>            |
| 48  | 100318             | 0.94      | 0.69 | <b>0.81</b> | <b>0.06</b>           | 0.13      | 0.31 | 0.52 | 0.57 | <b>0.21</b> | 0.18          | 0.92 | 0.64 | <b>0.70</b> | 0.00            | 0.00    | <b>0.00</b> | 0.71       | 0.82 | 0.71 | <b>0.76</b> | <b>0.22</b>            |
| 49  | 100319             | 0.65      | 0.66 | <b>0.67</b> | <b>0.98</b>           | 0.19      | 0.64 | 0.24 | 0.04 | <b>0.17</b> | 0.37          | 0.92 | 0.20 | <b>0.55</b> | 0.58            | 0.56    | <b>0.52</b> | 0.64       | 0.59 | 0.35 | <b>0.50</b> | <b>0.73</b>            |
| 50  | 100320             | 0.19      | 0.77 | <b>0.40</b> | <b>0.03</b>           | 0.18      | 0.75 | 0.31 | 0.58 | <b>0.68</b> | 0.68          | 0.83 | 0.07 | <b>0.57</b> | 0.86            | 0.60    | <b>0.77</b> | 0.64       | 0.59 | 0.35 | <b>0.50</b> | <b>0.48</b>            |
| 51  | 100401             | 0.50      | 0.55 | <b>0.52</b> | <b>0.54</b>           | 0.10      | 0.74 | 0.26 | 0.07 | <b>0.28</b> | 0.33          | 0.85 | 0.45 | <b>0.62</b> | 0.78            | 0.76    | <b>0.73</b> | 0.90       | 0.87 | 0.80 | <b>0.90</b> | <b>0.84</b>            |
| 52  | 100402             | 0.38      | 0.52 | <b>0.44</b> | <b>0.39</b>           | 0.10      | 0.91 | 0.10 | 0.05 | <b>0.60</b> | 0.12          | 0.27 | 0.44 | <b>0.09</b> | 0.97            | 0.46    | <b>0.94</b> | 0.90       | 0.87 | 0.80 | <b>0.90</b> | <b>0.72</b>            |
| 53  | 100403             | 0.53      | 0.64 | <b>0.61</b> | <b>0.60</b>           | 0.16      | 0.83 | 0.20 | 0.04 | <b>0.44</b> | 0.22          | 0.85 | 0.38 | <b>0.51</b> | 0.81            | 0.78    | <b>0.76</b> | 0.89       | 0.78 | 0.64 | <b>0.79</b> | <b>0.88</b>            |
| 54  | 100404             | 0.43      | 0.75 | <b>0.63</b> | <b>0.12</b>           | 0.17      | 0.93 | 0.14 | 0.00 | <b>0.69</b> | 0.01          | 0.55 | 0.26 | <b>0.09</b> | 0.90            | 0.35    | <b>0.81</b> | 0.89       | 0.78 | 0.64 | <b>0.79</b> | <b>0.59</b>            |
| 55  | 100405             | 0.89      | 0.85 | <b>0.87</b> | <b>0.31</b>           | 0.14      | 0.02 | 0.56 | 0.47 | <b>0.06</b> | 0.45          | 0.70 | 0.98 | <b>0.87</b> | 0.63            | 0.27    | <b>0.42</b> | 0.68       | 0.76 | 0.67 | <b>0.71</b> | <b>0.65</b>            |
| 56  | 100406             | 0.67      | 0.78 | <b>0.77</b> | <b>0.22</b>           | 0.17      | 0.91 | 0.22 | 0.01 | <b>0.53</b> | 0.21          | 0.93 | 0.34 | <b>0.54</b> | 0.60            | 0.70    | <b>0.64</b> | 0.41       | 0.71 | 0.50 | <b>0.52</b> | <b>0.64</b>            |
| 57  | 100407             | 0.57      | 0.60 | <b>0.58</b> | <b>0.75</b>           | 0.16      | 0.78 | 0.33 | 0.02 | <b>0.28</b> | 0.01          | 0.95 | 0.27 | <b>0.32</b> | 0.84            | 0.72    | <b>0.78</b> | 0.61       | 0.75 | 0.55 | <b>0.63</b> | <b>0.71</b>            |
| 58  | 100408             | 0.33      | 0.42 | <b>0.38</b> | <b>0.49</b>           | 0.12      | 0.61 | 0.40 | 0.29 | <b>0.38</b> | 0.22          | 0.09 | 0.47 | <b>0.08</b> | 0.94            | 0.25    | <b>0.87</b> | 0.58       | 0.53 | 0.42 | <b>0.48</b> | <b>0.30</b>            |
| 59  | 100409             | 0.27      | 0.34 | <b>0.29</b> | <b>0.24</b>           | 0.13      | 0.67 | 0.19 | 0.41 | <b>0.41</b> | 0.20          | 0.66 | 0.34 | <b>0.30</b> | 0.83            | 0.89    | <b>0.85</b> | 0.47       | 0.64 | 0.54 | <b>0.53</b> | <b>0.26</b>            |
| 60  | 100410             | 0.22      | 0.15 | <b>0.18</b> | <b>0.64</b>           | 0.11      | 0.66 | 0.67 | 0.14 | <b>0.40</b> | 0.96          | 0.27 | 0.37 | <b>0.59</b> | 1.00            | 0.67    | <b>1.00</b> | 0.48       | 0.49 | 0.41 | <b>0.43</b> | <b>0.65</b>            |
| 61  | 100411             | 0.38      | 1.00 | <b>0.92</b> | <b>0.02</b>           | 0.15      | 0.69 | 0.37 | 0.13 | <b>0.31</b> | 0.26          | 0.76 | 0.33 | <b>0.44</b> | 0.89            | 0.92    | <b>0.92</b> | 0.50       | 0.63 | 0.44 | <b>0.49</b> | <b>0.57</b>            |
| 62  | 100412             | 0.43      | 0.55 | <b>0.47</b> | <b>0.31</b>           | 0.17      | 0.87 | 0.25 | 0.03 | <b>0.52</b> | 0.16          | 0.62 | 0.22 | <b>0.15</b> | 0.84            | 0.77    | <b>0.79</b> | 0.44       | 0.64 | 0.47 | <b>0.48</b> | <b>0.33</b>            |
| 63  | 100413             | 0.20      | 0.12 | <b>0.14</b> | <b>0.75</b>           | 0.11      | 0.59 | 0.36 | 0.40 | <b>0.31</b> | 0.51          | 0.03 | 0.59 | <b>0.23</b> | 1.00            | 0.85    | <b>0.99</b> | 0.74       | 0.73 | 0.52 | <b>0.67</b> | <b>0.58</b>            |
| 64  | 100414             | 0.19      | 0.25 | <b>0.21</b> | <b>0.39</b>           | 0.15      | 0.76 | 0.18 | 0.12 | <b>0.39</b> | 0.27          | 0.58 | 0.19 | <b>0.18</b> | 0.82            | 0.89    | <b>0.84</b> | 0.53       | 0.61 | 0.38 | <b>0.47</b> | <b>0.18</b>            |
| 65  | 100501             | 0.18      | 0.29 | <b>0.22</b> | <b>0.01</b>           | 0.12      | 0.52 | 0.14 | 0.74 | <b>0.30</b> | 0.50          | 0.70 | 0.07 | <b>0.36</b> | 0.61            | 0.37    | <b>0.44</b> | 0.54       | 0.68 | 0.51 | <b>0.56</b> | <b>0.05</b>            |
| 66  | 100502             | 0.27      | 0.19 | <b>0.22</b> | <b>0.73</b>           | 0.14      | 0.44 | 0.25 | 0.56 | <b>0.20</b> | 0.53          | 0.67 | 0.09 | <b>0.37</b> | 0.86            | 0.56    | <b>0.75</b> | 0.56       | 0.81 | 0.73 | <b>0.69</b> | <b>0.48</b>            |
| 67  | 100503             | 0.35      | 0.40 | <b>0.39</b> | <b>0.69</b>           | 0.14      | 0.35 | 0.43 | 0.42 | <b>0.14</b> | 0.56          | 0.65 | 0.09 | <b>0.39</b> | 0.94            | 0.67    | <b>0.93</b> | 0.86       | 0.71 | 0.65 | <b>0.75</b> | <b>0.69</b>            |
| 68  | 100504             | 0.50      | 0.27 | <b>0.37</b> | <b>0.17</b>           | 0.41      | 0.17 | 0.71 | 0.50 | <b>0.22</b> | 0.42          | 0.34 | 0.89 | <b>0.64</b> | 0.97            | 0.36    | <b>0.95</b> | 0.72       | 0.89 | 0.86 | <b>0.86</b> | <b>0.63</b>            |
| 69  | 100505             | 0.41      | 0.38 | <b>0.40</b> | <b>0.25</b>           | 0.31      | 0.43 | 0.55 | 0.75 | <b>0.46</b> | 0.58          | 0.65 | 0.10 | <b>0.42</b> | 0.93            | 0.94    | <b>0.94</b> | 0.80       | 0.94 | 0.93 | <b>0.94</b> | <b>0.74</b>            |

| No. | Standard watershed | Landscape |      |             | Stream geo-morphology | Hydrology |      |      |      |             | Water quality |      |      |             | Aquatic habitat |         |             | Biological |      |      |             | Watershed health index |
|-----|--------------------|-----------|------|-------------|-----------------------|-----------|------|------|------|-------------|---------------|------|------|-------------|-----------------|---------|-------------|------------|------|------|-------------|------------------------|
|     |                    | GA        | ARA  | Integration |                       | Total     | SP   | SWD  | GWD  | Integration | Sed.          | T-N  | T-P  | Integration | Connectivity    | Wetland | Integration | RDI        | BMI  | FAI  | Integration |                        |
| 70  | 100601             | 0.69      | 0.44 | <b>0.51</b> | <b>0.83</b>           | 0.30      | 0.48 | 0.50 | 0.10 | <b>0.14</b> | 0.13          | 0.86 | 0.02 | <b>0.17</b> | 0.55            | 0.26    | <b>0.36</b> | 0.92       | 0.79 | 0.70 | <b>0.83</b> | <b>0.42</b>            |
| 71  | 100602             | 0.76      | 0.53 | <b>0.62</b> | <b>0.15</b>           | 0.67      | 0.05 | 0.83 | 0.67 | <b>0.27</b> | 0.64          | 0.51 | 0.00 | <b>0.25</b> | 0.79            | 0.41    | <b>0.66</b> | 0.79       | 0.82 | 0.77 | <b>0.83</b> | <b>0.37</b>            |
| 72  | 100603             | 0.55      | 0.41 | <b>0.45</b> | <b>0.61</b>           | 0.63      | 0.38 | 0.65 | 0.58 | <b>0.38</b> | 0.00          | 0.53 | 0.01 | <b>0.00</b> | 0.86            | 0.26    | <b>0.73</b> | 0.56       | 0.74 | 0.60 | <b>0.63</b> | <b>0.40</b>            |
| 73  | 100604             | 0.47      | 0.42 | <b>0.44</b> | <b>0.73</b>           | 0.53      | 0.27 | 0.59 | 0.77 | <b>0.37</b> | 0.55          | 0.32 | 0.03 | <b>0.10</b> | 0.90            | 0.63    | <b>0.85</b> | 0.47       | 0.72 | 0.47 | <b>0.53</b> | <b>0.52</b>            |
| 74  | 100605             | 0.31      | 0.36 | <b>0.33</b> | <b>0.32</b>           | 0.44      | 0.38 | 0.36 | 0.83 | <b>0.39</b> | 0.59          | 0.34 | 0.01 | <b>0.12</b> | 0.95            | 0.91    | <b>0.96</b> | 0.61       | 0.67 | 0.60 | <b>0.61</b> | <b>0.33</b>            |
| 75  | 100606             | 0.30      | 0.26 | <b>0.25</b> | <b>0.74</b>           | 0.52      | 0.54 | 0.32 | 0.65 | <b>0.47</b> | 0.40          | 0.75 | 0.02 | <b>0.27</b> | 0.98            | 0.78    | <b>0.97</b> | 0.36       | 0.69 | 0.48 | <b>0.47</b> | <b>0.61</b>            |
| 76  | 100607             | 0.48      | 0.36 | <b>0.42</b> | <b>0.46</b>           | 0.50      | 0.27 | 0.47 | 0.80 | <b>0.34</b> | 0.29          | 0.06 | 0.75 | <b>0.22</b> | 0.61            | 0.48    | <b>0.50</b> | 0.55       | 0.73 | 0.72 | <b>0.68</b> | <b>0.26</b>            |
| 77  | 100608             | 0.58      | 0.80 | <b>0.75</b> | <b>0.80</b>           | 0.52      | 0.05 | 0.74 | 0.53 | <b>0.18</b> | 0.63          | 0.36 | 0.01 | <b>0.16</b> | 0.66            | 0.81    | <b>0.69</b> | 0.43       | 0.61 | 0.55 | <b>0.50</b> | <b>0.57</b>            |
| 78  | 100609             | 0.32      | 0.24 | <b>0.26</b> | <b>0.52</b>           | 0.32      | 0.42 | 0.55 | 0.62 | <b>0.36</b> | 0.30          | 0.07 | 0.72 | <b>0.21</b> | 0.99            | 0.62    | <b>0.98</b> | 0.22       | 0.57 | 0.45 | <b>0.39</b> | <b>0.33</b>            |
| 79  | 100610             | 0.40      | 0.46 | <b>0.43</b> | <b>0.81</b>           | 0.44      | 0.25 | 0.60 | 0.55 | <b>0.24</b> | 0.66          | 0.40 | 0.03 | <b>0.21</b> | 0.89            | 0.94    | <b>0.93</b> | 0.36       | 0.55 | 0.42 | <b>0.42</b> | <b>0.54</b>            |
| 80  | 100701             | 0.12      | 0.07 | <b>0.10</b> | <b>0.47</b>           | 0.38      | 0.72 | 0.24 | 0.75 | <b>0.75</b> | 0.53          | 0.12 | 0.58 | <b>0.32</b> | 0.92            | 0.53    | <b>0.87</b> | 0.37       | 0.33 | 0.28 | <b>0.30</b> | <b>0.39</b>            |
| 81  | 100702             | 0.11      | 0.16 | <b>0.13</b> | <b>0.07</b>           | 0.28      | 0.72 | 0.27 | 0.72 | <b>0.74</b> | 0.43          | 0.12 | 0.61 | <b>0.26</b> | 0.96            | 0.39    | <b>0.92</b> | 0.37       | 0.33 | 0.28 | <b>0.30</b> | <b>0.17</b>            |
| 82  | 100703             | 0.04      | 0.03 | <b>0.03</b> | <b>0.58</b>           | 0.31      | 0.76 | 0.19 | 0.78 | <b>0.83</b> | 0.86          | 0.18 | 0.57 | <b>0.60</b> | 0.94            | 0.82    | <b>0.94</b> | 0.37       | 0.33 | 0.28 | <b>0.30</b> | <b>0.69</b>            |
| 83  | 100704             | 0.26      | 0.14 | <b>0.19</b> | <b>0.43</b>           | 0.43      | 0.58 | 0.66 | 0.61 | <b>0.61</b> | 0.84          | 0.16 | 0.47 | <b>0.53</b> | 0.97            | 0.78    | <b>0.97</b> | 0.37       | 0.33 | 0.28 | <b>0.30</b> | <b>0.52</b>            |
| 84  | 100705             | 0.11      | 0.10 | <b>0.11</b> | <b>0.56</b>           | 0.36      | 0.69 | 0.31 | 0.57 | <b>0.63</b> | 0.94          | 0.19 | 0.50 | <b>0.62</b> | 0.91            | 0.65    | <b>0.86</b> | 0.27       | 0.43 | 0.33 | <b>0.33</b> | <b>0.58</b>            |
| 85  | 100706             | 0.22      | 0.40 | <b>0.30</b> | <b>0.42</b>           | 0.58      | 0.58 | 0.17 | 0.76 | <b>0.53</b> | 0.60          | 0.54 | 0.06 | <b>0.29</b> | 0.57            | 0.98    | <b>0.91</b> | 0.22       | 0.38 | 0.26 | <b>0.27</b> | <b>0.32</b>            |
| 86  | 100707             | 0.31      | 0.31 | <b>0.31</b> | <b>0.29</b>           | 0.81      | 0.49 | 0.30 | 0.90 | <b>0.57</b> | 0.35          | 0.06 | 0.68 | <b>0.22</b> | 0.00            | 0.24    | <b>0.16</b> | 0.25       | 0.27 | 0.20 | <b>0.24</b> | <b>0.03</b>            |
| 87  | 100708             | 0.16      | 0.30 | <b>0.21</b> | <b>0.10</b>           | 0.54      | 0.60 | 0.14 | 0.90 | <b>0.70</b> | 0.49          | 0.52 | 0.06 | <b>0.19</b> | 0.00            | 0.95    | <b>0.80</b> | 0.32       | 0.30 | 0.34 | <b>0.29</b> | <b>0.12</b>            |
| 88  | 100709             | 0.16      | 0.06 | <b>0.11</b> | <b>0.09</b>           | 0.57      | 0.69 | 0.09 | 0.73 | <b>0.61</b> | 0.49          | 0.53 | 0.06 | <b>0.20</b> | 0.00            | 0.97    | <b>0.89</b> | 0.39       | 0.39 | 0.53 | <b>0.40</b> | <b>0.13</b>            |
| 89  | 100710             | 0.14      | 0.18 | <b>0.16</b> | <b>0.41</b>           | 0.48      | 0.84 | 0.06 | 0.59 | <b>0.85</b> | 0.61          | 0.04 | 0.54 | <b>0.28</b> | 0.75            | 0.92    | <b>0.82</b> | 0.48       | 0.64 | 0.81 | <b>0.64</b> | <b>0.60</b>            |
| 90  | 100711             | 0.03      | 0.15 | <b>0.07</b> | <b>0.85</b>           | 0.84      | 0.71 | 0.38 | 0.65 | <b>0.76</b> | 0.23          | 0.50 | 0.08 | <b>0.08</b> | 0.78            | 0.97    | <b>0.89</b> | 0.29       | 0.42 | 0.36 | <b>0.34</b> | <b>0.50</b>            |
| 91  | 100712             | 0.18      | 0.20 | <b>0.19</b> | <b>0.72</b>           | 0.51      | 0.65 | 0.28 | 0.78 | <b>0.70</b> | 0.46          | 0.09 | 0.48 | <b>0.17</b> | 0.70            | 0.00    | <b>0.49</b> | 0.40       | 0.34 | 0.36 | <b>0.36</b> | <b>0.28</b>            |
| 92  | 100713             | 0.08      | 0.08 | <b>0.07</b> | <b>0.32</b>           | 0.34      | 0.83 | 0.15 | 0.54 | <b>0.83</b> | 0.62          | 0.10 | 0.22 | <b>0.13</b> | 0.92            | 0.88    | <b>0.90</b> | 0.40       | 0.34 | 0.36 | <b>0.36</b> | <b>0.24</b>            |
| 93  | 100714             | 0.06      | 0.08 | <b>0.06</b> | <b>0.17</b>           | 0.42      | 0.74 | 0.27 | 0.86 | <b>0.86</b> | 0.83          | 0.11 | 0.31 | <b>0.34</b> | 0.93            | 0.96    | <b>0.97</b> | 0.20       | 0.28 | 0.24 | <b>0.23</b> | <b>0.28</b>            |
| 94  | 100715             | 0.41      | 0.44 | <b>0.42</b> | <b>0.26</b>           | 0.94      | 0.64 | 0.39 | 0.81 | <b>0.80</b> | 0.03          | 0.49 | 0.08 | <b>0.03</b> | 0.72            | 0.52    | <b>0.61</b> | 0.46       | 0.44 | 0.46 | <b>0.43</b> | <b>0.22</b>            |
| 95  | 100716             | 0.51      | 0.52 | <b>0.50</b> | <b>0.71</b>           | 0.82      | 0.31 | 0.81 | 0.44 | <b>0.29</b> | 0.60          | 0.48 | 0.84 | <b>0.78</b> | 0.59            | 0.51    | <b>0.51</b> | 0.58       | 0.37 | 0.37 | <b>0.42</b> | <b>0.63</b>            |
| 96  | 100717             | 0.35      | 0.32 | <b>0.34</b> | <b>0.65</b>           | 0.81      | 0.60 | 0.74 | 0.36 | <b>0.56</b> | 0.72          | 0.59 | 0.69 | <b>0.81</b> | 0.67            | 0.86    | <b>0.71</b> | 0.55       | 0.47 | 0.47 | <b>0.47</b> | <b>0.81</b>            |
| 97  | 100718             | 0.29      | 0.30 | <b>0.27</b> | <b>0.56</b>           | 0.73      | 0.71 | 0.69 | 0.10 | <b>0.55</b> | 0.04          | 0.51 | 0.09 | <b>0.05</b> | 0.85            | 0.61    | <b>0.75</b> | 0.42       | 0.32 | 0.27 | <b>0.31</b> | <b>0.18</b>            |
| 98  | 100719             | 0.47      | 0.33 | <b>0.42</b> | <b>0.24</b>           | 0.81      | 0.56 | 0.78 | 0.46 | <b>0.56</b> | 0.04          | 0.52 | 0.10 | <b>0.05</b> | 0.47            | 0.93    | <b>0.76</b> | 0.42       | 0.32 | 0.27 | <b>0.31</b> | <b>0.15</b>            |
| 99  | 100801             | 0.85      | 0.81 | <b>0.86</b> | <b>0.88</b>           | 0.04      | 0.09 | 0.44 | 0.25 | <b>0.03</b> | 0.20          | 0.62 | 0.90 | <b>0.70</b> | 0.41            | 0.81    | <b>0.60</b> | ND         | ND   | ND   | <b>ND</b>   | <b>0.56</b>            |
| 100 | 100802             | 0.83      | 0.78 | <b>0.82</b> | <b>0.95</b>           | 0.40      | 0.18 | 0.75 | 0.38 | <b>0.16</b> | 0.77          | 0.56 | 0.82 | <b>0.88</b> | 0.00            | 0.00    | <b>0.00</b> | ND         | ND   | ND   | <b>ND</b>   | <b>0.39</b>            |
| 101 | 100803             | 0.62      | 0.73 | <b>0.71</b> | <b>0.83</b>           | 0.44      | 0.28 | 0.72 | 0.31 | <b>0.17</b> | 0.19          | 0.03 | 0.73 | <b>0.14</b> | 0.00            | 0.00    | <b>0.00</b> | ND         | ND   | ND   | <b>ND</b>   | <b>0.05</b>            |
| 102 | 100804             | 0.39      | 0.34 | <b>0.36</b> | <b>0.90</b>           | 0.37      | 0.40 | 0.34 | 0.83 | <b>0.41</b> | 0.31          | 0.08 | 0.78 | <b>0.27</b> | 0.48            | 0.84    | <b>0.65</b> | ND         | ND   | ND   | <b>ND</b>   | <b>0.23</b>            |
| 103 | 100805             | 0.33      | 0.42 | <b>0.37</b> | <b>0.82</b>           | 0.39      | 0.45 | 0.51 | 0.45 | <b>0.27</b> | 0.76          | 0.15 | 0.75 | <b>0.63</b> | 0.00            | 0.00    | <b>0.00</b> | ND         | ND   | ND   | <b>ND</b>   | <b>0.09</b>            |
| 104 | 100806             | 0.53      | 0.84 | <b>0.76</b> | <b>0.82</b>           | 0.43      | 0.32 | 0.67 | 0.33 | <b>0.19</b> | 0.85          | 0.21 | 0.74 | <b>0.73</b> | 0.00            | 0.00    | <b>0.00</b> | ND         | ND   | ND   | <b>ND</b>   | <b>0.19</b>            |
| 105 | 100807             | 0.39      | 0.23 | <b>0.28</b> | <b>0.38</b>           | 0.41      | 0.45 | 0.57 | 0.37 | <b>0.25</b> | 0.21          | 0.05 | 0.71 | <b>0.15</b> | 0.00            | 0.00    | <b>0.00</b> | ND         | ND   | ND   | <b>ND</b>   | <b>0.00</b>            |
| 106 | 100808             | 0.64      | 0.58 | <b>0.59</b> | <b>0.50</b>           | 0.05      | 0.19 | 0.56 | 0.08 | <b>0.02</b> | 0.24          | 0.26 | 0.84 | <b>0.43</b> | 0.00            | 0.00    | <b>0.00</b> | ND         | ND   | ND   | <b>ND</b>   | <b>0.01</b>            |

| No. | Standard watershed | Landscape |      |             | Stream geo-morphology | Hydrology |      |      |      |             | Water quality |      |      |             | Aquatic habitat |         |             | Biological |      |      |             | Watershed health index |
|-----|--------------------|-----------|------|-------------|-----------------------|-----------|------|------|------|-------------|---------------|------|------|-------------|-----------------|---------|-------------|------------|------|------|-------------|------------------------|
|     |                    | GA        | ARA  | Integration |                       | Total     | SP   | SWD  | GWD  | Integration | Sed.          | T-N  | T-P  | Integration | Connectivity    | Wetland | Integration | RDI        | BMI  | FAI  | Integration |                        |
| 107 | 100809             | 0.53      | 0.86 | <b>0.77</b> | <b>0.84</b>           | 0.03      | 0.23 | 0.44 | 0.15 | <b>0.03</b> | 0.14          | 0.67 | 0.85 | <b>0.65</b> | 0.00            | 0.00    | <b>0.00</b> | ND         | ND   | ND   | <b>ND</b>   | <b>0.13</b>            |
| 108 | 100810             | 0.56      | 0.59 | <b>0.56</b> | <b>0.91</b>           | 0.01      | 0.20 | 0.48 | 0.14 | <b>0.03</b> | 0.24          | 0.13 | 0.83 | <b>0.30</b> | 0.00            | 0.00    | <b>0.00</b> | ND         | ND   | ND   | <b>ND</b>   | <b>0.03</b>            |
| 109 | 100811             | 0.58      | 0.50 | <b>0.52</b> | <b>0.28</b>           | 0.05      | 0.21 | 0.54 | 0.06 | <b>0.02</b> | 0.70          | 0.55 | 0.81 | <b>0.83</b> | 0.00            | 0.00    | <b>0.00</b> | ND         | ND   | ND   | <b>ND</b>   | <b>0.02</b>            |
| 110 | 100812             | 0.99      | 0.98 | <b>0.99</b> | <b>0.80</b>           | 0.07      | 0.00 | 0.71 | 0.06 | <b>0.00</b> | 0.92          | 0.88 | 0.84 | <b>0.99</b> | 0.00            | 0.00    | <b>0.00</b> | ND         | ND   | ND   | <b>ND</b>   | <b>0.38</b>            |
| 111 | 100813             | 0.99      | 1.00 | <b>1.00</b> | <b>0.29</b>           | 0.50      | 0.03 | 0.94 | 0.13 | <b>0.10</b> | 0.83          | 0.37 | 0.73 | <b>0.78</b> | 0.00            | 0.00    | <b>0.00</b> | ND         | ND   | ND   | <b>ND</b>   | <b>0.10</b>            |
| 112 | 100901             | 0.94      | 0.92 | <b>0.94</b> | <b>0.87</b>           | 0.49      | 0.03 | 0.87 | 0.20 | <b>0.10</b> | 0.57          | 0.65 | 0.99 | <b>0.90</b> | 0.00            | 0.00    | <b>0.00</b> | ND         | ND   | ND   | <b>ND</b>   | <b>0.40</b>            |
| 113 | 100902             | 0.71      | 0.54 | <b>0.62</b> | <b>0.94</b>           | 0.47      | 0.17 | 0.76 | 0.32 | <b>0.15</b> | 0.44          | 0.71 | 0.95 | <b>0.85</b> | 0.00            | 0.00    | <b>0.00</b> | ND         | ND   | ND   | <b>ND</b>   | <b>0.22</b>            |
| 114 | 100903             | 0.95      | 0.97 | <b>0.98</b> | <b>0.91</b>           | 0.07      | 0.02 | 0.68 | 0.06 | <b>0.00</b> | 0.90          | 0.61 | 0.76 | <b>0.92</b> | 0.00            | 0.00    | <b>0.00</b> | ND         | ND   | ND   | <b>ND</b>   | <b>0.41</b>            |
| 115 | 100904             | 1.00      | 0.94 | <b>0.97</b> | <b>0.36</b>           | 0.08      | 0.11 | 0.70 | 0.12 | <b>0.04</b> | 0.92          | 0.74 | 0.77 | <b>0.96</b> | 0.00            | 0.31    | <b>0.18</b> | 0.52       | 0.37 | 0.38 | <b>0.40</b> | <b>0.46</b>            |
| 116 | 101001             | 0.97      | 0.95 | <b>0.97</b> | <b>0.31</b>           | 0.06      | 0.01 | 0.65 | 0.11 | <b>0.01</b> | 0.52          | 0.90 | 1.00 | <b>0.95</b> | 0.00            | 0.00    | <b>0.00</b> | ND         | ND   | ND   | <b>ND</b>   | <b>0.12</b>            |
| 117 | 101002             | 0.95      | 0.97 | <b>0.98</b> | <b>0.39</b>           | 0.06      | 0.01 | 0.66 | 0.11 | <b>0.01</b> | 0.54          | 0.95 | 0.99 | <b>0.97</b> | 0.00            | 0.00    | <b>0.00</b> | ND         | ND   | ND   | <b>ND</b>   | <b>0.15</b>            |
| 118 | 101003             | 0.91      | 0.39 | <b>0.54</b> | <b>0.50</b>           | 0.09      | 0.11 | 0.63 | 0.25 | <b>0.04</b> | 0.73          | 0.98 | 0.97 | <b>1.00</b> | 0.00            | 0.23    | <b>0.16</b> | ND         | ND   | ND   | <b>ND</b>   | <b>0.11</b>            |
| 119 | 101004             | 0.45      | 0.19 | <b>0.30</b> | <b>0.77</b>           | 0.04      | 0.13 | 0.46 | 0.44 | <b>0.07</b> | 0.47          | 0.78 | 0.86 | <b>0.86</b> | 0.87            | 0.56    | <b>0.78</b> | 0.51       | 0.42 | 0.64 | <b>0.50</b> | <b>0.67</b>            |
| 120 | 101005             | 0.72      | 0.37 | <b>0.47</b> | <b>0.48</b>           | 0.08      | 0.04 | 0.58 | 0.43 | <b>0.06</b> | 0.89          | 0.90 | 0.92 | <b>1.00</b> | 0.00            | 0.42    | <b>0.22</b> | ND         | ND   | ND   | <b>ND</b>   | <b>0.11</b>            |
| 121 | 101006             | 0.78      | 0.81 | <b>0.83</b> | <b>0.78</b>           | 0.37      | 0.07 | 0.97 | 0.25 | <b>0.24</b> | 0.79          | 0.78 | 0.79 | <b>0.94</b> | 0.63            | 0.69    | <b>0.63</b> | ND         | ND   | ND   | <b>ND</b>   | <b>0.74</b>            |
| 122 | 101007             | 0.84      | 0.48 | <b>0.58</b> | <b>0.19</b>           | 0.33      | 0.22 | 0.97 | 0.16 | <b>0.25</b> | 0.93          | 0.81 | 0.80 | <b>0.98</b> | 0.54            | 0.81    | <b>0.66</b> | 0.34       | 0.29 | 0.33 | <b>0.29</b> | <b>0.47</b>            |
| 123 | 101008             | 0.86      | 0.75 | <b>0.81</b> | <b>0.92</b>           | 0.42      | 0.15 | 0.92 | 0.22 | <b>0.18</b> | 0.70          | 0.84 | 0.98 | <b>0.98</b> | 0.39            | 0.57    | <b>0.38</b> | 0.50       | 0.45 | 0.45 | <b>0.44</b> | <b>0.88</b>            |
| 124 | 101009             | 0.81      | 0.97 | <b>0.95</b> | <b>0.42</b>           | 0.39      | 0.11 | 0.96 | 0.24 | <b>0.23</b> | 0.90          | 0.79 | 0.81 | <b>0.97</b> | 0.00            | 0.64    | <b>0.39</b> | 0.56       | 0.60 | 0.69 | <b>0.59</b> | <b>0.81</b>            |
| 125 | 101010             | 0.73      | 0.51 | <b>0.57</b> | <b>0.78</b>           | 0.55      | 0.20 | 0.77 | 0.32 | <b>0.16</b> | 0.23          | 0.80 | 0.74 | <b>0.72</b> | 0.00            | 0.33    | <b>0.19</b> | 0.75       | 0.56 | 0.58 | <b>0.61</b> | <b>0.53</b>            |
| 126 | 101011             | 0.87      | 0.56 | <b>0.68</b> | <b>0.61</b>           | 0.56      | 0.24 | 0.85 | 0.42 | <b>0.25</b> | 0.81          | 0.81 | 0.78 | <b>0.95</b> | 0.53            | 0.29    | <b>0.34</b> | 0.59       | 0.58 | 0.73 | <b>0.62</b> | <b>0.75</b>            |
| 127 | 101012             | 0.45      | 0.50 | <b>0.46</b> | <b>0.03</b>           | 0.57      | 0.10 | 0.87 | 0.60 | <b>0.28</b> | 0.95          | 0.79 | 0.76 | <b>0.98</b> | 0.92            | 0.00    | <b>0.84</b> | 0.63       | 0.58 | 0.74 | <b>0.64</b> | <b>0.66</b>            |
| 128 | 101101             | 0.88      | 0.71 | <b>0.78</b> | <b>0.87</b>           | 0.00      | 0.36 | 0.31 | 0.30 | <b>0.08</b> | 0.17          | 0.23 | 0.67 | <b>0.20</b> | 0.00            | 0.00    | <b>0.00</b> | 0.73       | 0.62 | 0.78 | <b>0.72</b> | <b>0.29</b>            |
| 129 | 101102             | 0.69      | 0.76 | <b>0.78</b> | <b>0.93</b>           | 0.03      | 0.39 | 0.39 | 0.35 | <b>0.11</b> | 0.51          | 0.82 | 0.60 | <b>0.78</b> | 0.39            | 0.39    | <b>0.27</b> | 0.73       | 0.62 | 0.78 | <b>0.72</b> | <b>0.84</b>            |
| 130 | 101103             | 0.96      | 0.68 | <b>0.82</b> | <b>0.94</b>           | 0.02      | 0.25 | 0.50 | 0.28 | <b>0.05</b> | 0.14          | 0.88 | 0.61 | <b>0.61</b> | 0.47            | 0.68    | <b>0.50</b> | 0.96       | 0.86 | 0.98 | <b>0.98</b> | <b>0.95</b>            |
| 131 | 101104             | 0.89      | 0.96 | <b>0.96</b> | <b>0.60</b>           | 0.03      | 0.14 | 0.79 | 0.24 | <b>0.08</b> | 0.51          | 0.95 | 0.62 | <b>0.84</b> | 0.42            | 0.65    | <b>0.41</b> | 0.93       | 0.65 | 0.93 | <b>0.88</b> | <b>0.91</b>            |
| 132 | 101201             | 0.94      | 0.88 | <b>0.91</b> | <b>0.97</b>           | 0.99      | 0.77 | 0.94 | 0.78 | <b>0.95</b> | 0.13          | 0.58 | 0.46 | <b>0.28</b> | 0.00            | 0.25    | <b>0.17</b> | 0.83       | 0.97 | 0.88 | <b>0.95</b> | <b>0.99</b>            |
| 133 | 101202             | 0.91      | 0.92 | <b>0.93</b> | <b>0.71</b>           | 0.08      | 0.34 | 0.48 | 0.40 | <b>0.12</b> | 0.40          | 0.73 | 0.66 | <b>0.73</b> | 0.00            | 0.32    | <b>0.19</b> | 0.92       | 0.99 | 1.00 | <b>1.00</b> | <b>0.87</b>            |
| 134 | 101203             | 0.81      | 0.43 | <b>0.55</b> | <b>0.04</b>           | 0.02      | 0.28 | 0.64 | 0.17 | <b>0.07</b> | 0.43          | 0.68 | 0.45 | <b>0.56</b> | 0.56            | 0.73    | <b>0.62</b> | 0.81       | 0.99 | 1.00 | <b>0.98</b> | <b>0.41</b>            |
| 135 | 101204             | 0.98      | 0.83 | <b>0.91</b> | <b>0.81</b>           | 0.00      | 0.30 | 0.42 | 0.31 | <b>0.09</b> | 0.15          | 0.97 | 0.60 | <b>0.68</b> | 0.00            | 0.47    | <b>0.25</b> | 0.99       | 1.00 | 0.90 | <b>1.00</b> | <b>0.89</b>            |
| 136 | 101205             | 0.92      | 0.82 | <b>0.88</b> | <b>0.92</b>           | 0.06      | 0.13 | 0.57 | 0.28 | <b>0.05</b> | 0.48          | 0.84 | 0.45 | <b>0.71</b> | 0.00            | 0.69    | <b>0.39</b> | 0.73       | 1.00 | 0.99 | <b>0.97</b> | <b>0.96</b>            |
| 137 | 101206             | 0.93      | 0.82 | <b>0.89</b> | <b>0.94</b>           | 0.01      | 0.16 | 0.78 | 0.17 | <b>0.06</b> | 0.52          | 0.91 | 0.46 | <b>0.77</b> | 0.00            | 0.99    | <b>0.90</b> | 0.70       | 0.98 | 0.92 | <b>0.91</b> | <b>1.00</b>            |
| 138 | 101207             | 0.97      | 0.94 | <b>0.96</b> | <b>0.96</b>           | 0.53      | 0.44 | 0.96 | 0.03 | <b>0.21</b> | 0.57          | 0.98 | 0.49 | <b>0.82</b> | 0.00            | 0.49    | <b>0.26</b> | 0.78       | 0.97 | 0.95 | <b>0.95</b> | <b>0.98</b>            |
| 139 | 101208             | 0.34      | 0.17 | <b>0.24</b> | <b>0.28</b>           | 0.50      | 0.73 | 0.54 | 0.33 | <b>0.64</b> | 0.78          | 0.59 | 0.16 | <b>0.56</b> | 0.82            | 0.66    | <b>0.74</b> | 0.87       | 0.97 | 0.98 | <b>0.99</b> | <b>0.75</b>            |
| 140 | 101301             | 0.11      | 0.05 | <b>0.08</b> | <b>0.13</b>           | 0.29      | 0.65 | 0.26 | 0.64 | <b>0.57</b> | 0.15          | 0.96 | 0.05 | <b>0.26</b> | 0.98            | 0.00    | <b>0.95</b> | 0.82       | 0.51 | 0.57 | <b>0.61</b> | <b>0.25</b>            |
| 141 | 101302             | 0.37      | 0.65 | <b>0.48</b> | <b>0.20</b>           | 0.56      | 0.53 | 0.75 | 0.61 | <b>0.55</b> | 0.74          | 0.33 | 0.21 | <b>0.37</b> | 0.74            | 0.58    | <b>0.64</b> | 0.85       | 0.72 | 0.90 | <b>0.86</b> | <b>0.58</b>            |
| 142 | 101303             | 0.56      | 0.86 | <b>0.80</b> | <b>0.10</b>           | 0.58      | 0.07 | 0.91 | 0.63 | <b>0.33</b> | 0.69          | 0.46 | 0.94 | <b>0.85</b> | 0.68            | 0.31    | <b>0.48</b> | 0.82       | 0.51 | 0.57 | <b>0.61</b> | <b>0.61</b>            |
| 143 | 101304             | 0.65      | 0.74 | <b>0.74</b> | <b>0.38</b>           | 0.58      | 0.41 | 0.84 | 0.56 | <b>0.47</b> | 0.80          | 0.35 | 0.23 | <b>0.45</b> | 0.47            | 0.38    | <b>0.33</b> | 0.51       | 0.44 | 0.83 | <b>0.58</b> | <b>0.47</b>            |

| No. | Standard watershed | Landscape |      |             | Stream geo-morphology | Hydrology |      |      |      |             | Water quality |      |      |             | Aquatic habitat |         |             | Biological |      |      |             | Watershed health index |
|-----|--------------------|-----------|------|-------------|-----------------------|-----------|------|------|------|-------------|---------------|------|------|-------------|-----------------|---------|-------------|------------|------|------|-------------|------------------------|
|     |                    | GA        | ARA  | Integration |                       | Total     | SP   | SWD  | GWD  | Integration | Sed.          | T-N  | T-P  | Integration | Connectivity    | Wetland | Integration | RDI        | BMI  | FAI  | Integration |                        |
| 144 | 101305             | 0.97      | 0.86 | <b>0.92</b> | <b>0.61</b>           | 0.69      | 0.50 | 0.30 | 0.69 | <b>0.43</b> | 0.58          | 0.47 | 0.63 | <b>0.67</b> | 0.00            | 0.00    | <b>0.00</b> | 0.96       | 0.86 | 0.62 | <b>0.85</b> | <b>0.77</b>            |
| 145 | 101306             | 0.76      | 0.51 | <b>0.60</b> | <b>0.76</b>           | 0.64      | 0.40 | 0.50 | 0.64 | <b>0.35</b> | 0.94          | 0.53 | 0.52 | <b>0.80</b> | 0.42            | 0.41    | <b>0.28</b> | 0.83       | 0.65 | 0.70 | <b>0.74</b> | <b>0.80</b>            |
| 146 | 101307             | 0.61      | 0.84 | <b>0.79</b> | <b>0.28</b>           | 0.72      | 0.29 | 0.75 | 0.70 | <b>0.42</b> | 0.18          | 0.48 | 0.62 | <b>0.37</b> | 0.00            | 0.54    | <b>0.31</b> | 0.62       | 0.61 | 0.74 | <b>0.66</b> | <b>0.42</b>            |
| 147 | 101401             | 0.84      | 0.41 | <b>0.54</b> | <b>0.86</b>           | 0.56      | 0.30 | 0.88 | 0.48 | <b>0.32</b> | 0.76          | 0.38 | 0.24 | <b>0.47</b> | 0.62            | 0.47    | <b>0.49</b> | 0.75       | 0.45 | 0.67 | <b>0.59</b> | <b>0.68</b>            |
| 148 | 101402             | 0.62      | 0.49 | <b>0.53</b> | <b>0.57</b>           | 0.61      | 0.15 | 0.89 | 0.79 | <b>0.47</b> | 0.65          | 0.68 | 0.66 | <b>0.80</b> | 0.60            | 0.59    | <b>0.54</b> | 0.75       | 0.45 | 0.67 | <b>0.59</b> | <b>0.79</b>            |
| 149 | 101403             | 0.82      | 0.93 | <b>0.93</b> | <b>0.70</b>           | 0.09      | 0.06 | 0.59 | 0.45 | <b>0.09</b> | 0.67          | 0.57 | 0.90 | <b>0.88</b> | 0.00            | 0.44    | <b>0.23</b> | 1.00       | 0.69 | 0.87 | <b>0.90</b> | <b>0.89</b>            |
| 150 | 101404             | 0.72      | 0.74 | <b>0.74</b> | <b>0.13</b>           | 0.69      | 0.22 | 0.82 | 0.56 | <b>0.31</b> | 0.77          | 0.63 | 0.68 | <b>0.84</b> | 0.51            | 0.64    | <b>0.47</b> | 0.84       | 0.63 | 0.86 | <b>0.81</b> | <b>0.70</b>            |
| 151 | 101405             | 0.87      | 0.89 | <b>0.90</b> | <b>0.15</b>           | 0.68      | 0.10 | 0.90 | 0.63 | <b>0.34</b> | 0.74          | 0.47 | 0.93 | <b>0.87</b> | 0.52            | 0.31    | <b>0.33</b> | 0.93       | 0.77 | 0.96 | <b>0.94</b> | <b>0.79</b>            |
| 152 | 101406             | 0.59      | 0.79 | <b>0.76</b> | <b>0.20</b>           | 0.67      | 0.19 | 0.69 | 0.74 | <b>0.33</b> | 0.76          | 0.62 | 0.70 | <b>0.84</b> | 0.73            | 0.77    | <b>0.71</b> | 0.93       | 0.77 | 0.96 | <b>0.94</b> | <b>0.92</b>            |
| 153 | 101407             | 0.52      | 0.70 | <b>0.64</b> | <b>0.40</b>           | 0.65      | 0.14 | 0.76 | 0.77 | <b>0.37</b> | 0.66          | 0.30 | 0.91 | <b>0.76</b> | 0.85            | 0.74    | <b>0.78</b> | 0.94       | 0.93 | 0.78 | <b>0.93</b> | <b>0.94</b>            |
| 154 | 101408             | 0.44      | 0.72 | <b>0.58</b> | <b>0.35</b>           | 0.60      | 0.21 | 0.80 | 0.50 | <b>0.26</b> | 0.92          | 0.56 | 0.72 | <b>0.90</b> | 0.58            | 0.76    | <b>0.64</b> | 0.94       | 0.93 | 0.78 | <b>0.93</b> | <b>0.87</b>            |
| 155 | 101409             | 0.79      | 0.56 | <b>0.65</b> | <b>0.11</b>           | 0.71      | 0.23 | 0.79 | 0.62 | <b>0.33</b> | 0.68          | 0.45 | 0.78 | <b>0.77</b> | 0.65            | 0.00    | <b>0.42</b> | 0.97       | 0.50 | 0.65 | <b>0.71</b> | <b>0.50</b>            |
| 156 | 101410             | 0.63      | 0.66 | <b>0.67</b> | <b>0.16</b>           | 0.70      | 0.06 | 0.85 | 0.82 | <b>0.43</b> | 0.88          | 0.64 | 0.67 | <b>0.89</b> | 0.83            | 0.50    | <b>0.72</b> | 0.97       | 0.50 | 0.65 | <b>0.71</b> | <b>0.82</b>            |
| 157 | 101411             | 0.44      | 0.50 | <b>0.45</b> | <b>0.44</b>           | 0.59      | 0.29 | 0.61 | 0.69 | <b>0.35</b> | 0.59          | 0.49 | 0.77 | <b>0.75</b> | 0.91            | 0.60    | <b>0.86</b> | 0.97       | 0.50 | 0.65 | <b>0.71</b> | <b>0.81</b>            |
| 158 | 101412             | 0.55      | 0.31 | <b>0.41</b> | <b>0.53</b>           | 0.63      | 0.33 | 0.86 | 0.71 | <b>0.49</b> | 0.86          | 0.72 | 0.69 | <b>0.92</b> | 0.53            | 0.67    | <b>0.53</b> | 0.59       | 0.39 | 0.50 | <b>0.45</b> | <b>0.71</b>            |
| 159 | 101413             | 0.83      | 0.87 | <b>0.88</b> | <b>0.17</b>           | 0.77      | 0.19 | 0.95 | 0.11 | <b>0.17</b> | 0.53          | 0.83 | 0.95 | <b>0.92</b> | 0.00            | 0.37    | <b>0.20</b> | 0.76       | 0.89 | 0.95 | <b>0.92</b> | <b>0.67</b>            |
| 160 | 101414             | 0.60      | 0.47 | <b>0.50</b> | <b>0.44</b>           | 0.54      | 0.36 | 0.83 | 0.41 | <b>0.29</b> | 0.93          | 0.73 | 0.67 | <b>0.93</b> | 0.67            | 0.70    | <b>0.65</b> | 0.76       | 0.89 | 0.95 | <b>0.92</b> | <b>0.90</b>            |
| 161 | 101501             | 0.49      | 0.77 | <b>0.69</b> | <b>0.08</b>           | 0.78      | 0.47 | 0.81 | 0.54 | <b>0.51</b> | 0.56          | 0.44 | 0.71 | <b>0.68</b> | 0.00            | 0.83    | <b>0.58</b> | 0.87       | 0.58 | 0.89 | <b>0.82</b> | <b>0.72</b>            |
| 162 | 101502             | 0.90      | 0.90 | <b>0.92</b> | <b>0.08</b>           | 0.85      | 0.39 | 0.89 | 0.31 | <b>0.36</b> | 0.75          | 0.37 | 0.26 | <b>0.46</b> | 0.00            | 0.83    | <b>0.58</b> | 0.87       | 0.58 | 0.89 | <b>0.82</b> | <b>0.64</b>            |
| 163 | 101503             | 0.61      | 0.60 | <b>0.61</b> | <b>0.67</b>           | 0.94      | 0.42 | 0.53 | 0.81 | <b>0.54</b> | 0.42          | 0.10 | 0.79 | <b>0.41</b> | 0.00            | 0.30    | <b>0.18</b> | 0.91       | 0.91 | 0.99 | <b>0.99</b> | <b>0.73</b>            |
| 164 | 101504             | 0.66      | 0.70 | <b>0.71</b> | <b>0.32</b>           | 0.93      | 0.33 | 0.73 | 0.64 | <b>0.42</b> | 0.79          | 0.31 | 0.55 | <b>0.64</b> | 0.55            | 0.00    | <b>0.32</b> | 0.88       | 0.49 | 0.50 | <b>0.60</b> | <b>0.51</b>            |
| 165 | 101505             | 0.61      | 0.45 | <b>0.50</b> | <b>0.16</b>           | 0.90      | 0.53 | 0.84 | 0.22 | <b>0.46</b> | 0.42          | 0.29 | 0.70 | <b>0.48</b> | 0.00            | 0.00    | <b>0.00</b> | 0.69       | 0.41 | 0.62 | <b>0.54</b> | <b>0.10</b>            |
| 166 | 101506             | 0.82      | 0.95 | <b>0.94</b> | <b>0.03</b>           | 0.94      | 0.53 | 0.44 | 0.68 | <b>0.54</b> | 0.82          | 0.35 | 0.27 | <b>0.50</b> | 0.00            | 0.75    | <b>0.50</b> | 0.65       | 0.46 | 0.48 | <b>0.51</b> | <b>0.52</b>            |
| 167 | 101507             | 0.75      | 0.85 | <b>0.84</b> | <b>0.14</b>           | 0.76      | 0.33 | 0.94 | 0.08 | <b>0.22</b> | 0.48          | 0.94 | 0.94 | <b>0.95</b> | 0.00            | 0.00    | <b>0.00</b> | 0.67       | 0.55 | 0.72 | <b>0.64</b> | <b>0.39</b>            |
| 168 | 101508             | 0.44      | 0.64 | <b>0.53</b> | <b>0.72</b>           | 0.83      | 0.50 | 0.88 | 0.21 | <b>0.44</b> | 0.69          | 0.41 | 0.28 | <b>0.46</b> | 0.69            | 0.45    | <b>0.55</b> | 0.65       | 0.46 | 0.48 | <b>0.51</b> | <b>0.62</b>            |
| 169 | 101601             | 0.24      | 0.33 | <b>0.27</b> | <b>0.69</b>           | 0.33      | 0.70 | 0.42 | 0.52 | <b>0.63</b> | 0.62          | 0.15 | 0.17 | <b>0.13</b> | 0.88            | 0.33    | <b>0.77</b> | 0.66       | 0.40 | 0.43 | <b>0.46</b> | <b>0.47</b>            |
| 170 | 101602             | 0.29      | 0.24 | <b>0.24</b> | <b>0.00</b>           | 0.53      | 0.63 | 0.49 | 0.72 | <b>0.69</b> | 0.56          | 0.16 | 0.19 | <b>0.11</b> | 0.68            | 0.00    | <b>0.46</b> | 0.66       | 0.40 | 0.43 | <b>0.46</b> | <b>0.07</b>            |
| 171 | 101603             | 0.28      | 0.48 | <b>0.36</b> | <b>0.25</b>           | 0.70      | 0.61 | 0.67 | 0.61 | <b>0.72</b> | 0.70          | 0.08 | 0.18 | <b>0.14</b> | 0.89            | 0.89    | <b>0.88</b> | 0.34       | 0.48 | 0.49 | <b>0.42</b> | <b>0.36</b>            |
| 172 | 101604             | 0.33      | 0.37 | <b>0.35</b> | <b>0.64</b>           | 0.45      | 0.55 | 0.78 | 0.47 | <b>0.52</b> | 0.81          | 0.14 | 0.51 | <b>0.51</b> | 0.76            | 0.40    | <b>0.62</b> | 0.36       | 0.31 | 0.34 | <b>0.32</b> | <b>0.48</b>            |
| 173 | 101605             | 0.46      | 0.71 | <b>0.61</b> | <b>0.43</b>           | 0.78      | 0.31 | 0.95 | 0.50 | <b>0.49</b> | 0.88          | 0.17 | 0.28 | <b>0.42</b> | 0.45            | 0.80    | <b>0.63</b> | 0.39       | 0.28 | 0.28 | <b>0.28</b> | <b>0.43</b>            |
| 174 | 101701             | 0.70      | 0.91 | <b>0.87</b> | <b>0.01</b>           | 0.86      | 0.36 | 0.97 | 0.14 | <b>0.32</b> | 0.11          | 0.46 | 0.14 | <b>0.06</b> | 0.00            | 0.99    | <b>0.98</b> | 0.35       | 0.27 | 0.25 | <b>0.28</b> | <b>0.19</b>            |
| 175 | 101801             | 0.25      | 0.09 | <b>0.17</b> | <b>0.63</b>           | 0.89      | 0.73 | 0.73 | 0.55 | <b>0.85</b> | 0.06          | 0.39 | 0.15 | <b>0.03</b> | 0.77            | 0.66    | <b>0.68</b> | 0.32       | 0.25 | 0.25 | <b>0.26</b> | <b>0.25</b>            |
| 176 | 101802             | 0.36      | 0.31 | <b>0.32</b> | <b>0.86</b>           | 0.92      | 0.52 | 0.89 | 0.67 | <b>0.66</b> | 0.59          | 0.29 | 0.76 | <b>0.62</b> | 0.66            | 0.00    | <b>0.43</b> | 0.23       | 0.26 | 0.30 | <b>0.25</b> | <b>0.60</b>            |
| 177 | 101803             | 0.17      | 0.14 | <b>0.16</b> | <b>0.19</b>           | 0.82      | 0.81 | 0.52 | 0.42 | <b>0.86</b> | 0.82          | 0.22 | 0.53 | <b>0.56</b> | 0.52            | 0.00    | <b>0.30</b> | 0.31       | 0.25 | 0.22 | <b>0.25</b> | <b>0.14</b>            |
| 178 | 101804             | 0.21      | 0.25 | <b>0.23</b> | <b>0.34</b>           | 0.77      | 0.68 | 0.45 | 0.75 | <b>0.79</b> | 0.71          | 0.09 | 0.28 | <b>0.21</b> | 0.69            | 0.52    | <b>0.58</b> | 0.30       | 0.20 | 0.22 | <b>0.23</b> | <b>0.17</b>            |
| 179 | 101805             | 0.17      | 0.18 | <b>0.17</b> | <b>0.33</b>           | 0.75      | 0.78 | 0.41 | 0.47 | <b>0.81</b> | 0.25          | 0.72 | 0.11 | <b>0.20</b> | 0.75            | 0.92    | <b>0.81</b> | 0.18       | 0.19 | 0.23 | <b>0.17</b> | <b>0.19</b>            |
| 180 | 101806             | 0.09      | 0.07 | <b>0.08</b> | <b>0.45</b>           | 0.73      | 0.88 | 0.35 | 0.18 | <b>0.87</b> | 0.41          | 0.51 | 0.11 | <b>0.17</b> | 0.78            | 0.93    | <b>0.86</b> | 0.25       | 0.21 | 0.21 | <b>0.21</b> | <b>0.29</b>            |

| No. | Standard watershed | Landscape |      |             | Stream geo-morphology | Hydrology |      |      |      | Water quality |      |      |      | Aquatic habitat |              |         | Biological  |      |      |      | Watershed health index |             |
|-----|--------------------|-----------|------|-------------|-----------------------|-----------|------|------|------|---------------|------|------|------|-----------------|--------------|---------|-------------|------|------|------|------------------------|-------------|
|     |                    | GA        | ARA  | Integration |                       | Total     | SP   | SWD  | GWD  | Integration   | Sed. | T-N  | T-P  | Integration     | Connectivity | Wetland | Integration | RDI  | BMI  | FAI  |                        | Integration |
| 181 | 101807             | 0.05      | 0.02 | 0.03        | 0.40                  | 0.76      | 0.94 | 0.12 | 0.16 | 0.92          | 0.07 | 0.39 | 0.15 | 0.03            | 0.70         | 0.36    | 0.53        | 0.29 | 0.17 | 0.19 | 0.19                   | 0.09        |
| 182 | 101808             | 0.25      | 0.22 | 0.23        | 0.51                  | 0.86      | 0.49 | 0.45 | 0.89 | 0.60          | 0.50 | 0.48 | 0.17 | 0.25            | 0.76         | 0.28    | 0.57        | 0.19 | 0.21 | 0.22 | 0.18                   | 0.14        |
| 183 | 101809             | 0.01      | 0.00 | 0.00        | 0.14                  | 0.80      | 0.92 | 0.01 | 0.27 | 0.84          | 0.97 | 0.00 | 0.17 | 0.24            | 0.00         | 0.00    | 0.00        | 0.28 | 0.20 | 0.20 | 0.22                   | 0.01        |
| 184 | 101810             | 0.09      | 0.13 | 0.09        | 0.51                  | 0.80      | 0.86 | 0.04 | 0.37 | 0.75          | 0.87 | 0.12 | 0.15 | 0.23            | 0.00         | 0.53    | 0.30        | 0.19 | 0.22 | 0.21 | 0.18                   | 0.08        |
| 185 | 101811             | 0.02      | 0.01 | 0.01        | 0.05                  | 0.74      | 0.97 | 0.03 | 0.03 | 0.90          | 0.07 | 0.37 | 0.14 | 0.02            | 0.00         | 0.39    | 0.21        | 0.29 | 0.17 | 0.19 | 0.19                   | 0.00        |
| 186 | 101812             | 0.01      | 0.99 | 0.33        | 0.00                  | 0.61      | 0.98 | 0.00 | 0.01 | 0.89          | 0.08 | 0.38 | 0.13 | 0.02            | 0.00         | 0.72    | 0.46        | 0.24 | 0.22 | 0.23 | 0.22                   | 0.06        |
| 187 | 101813             | 0.03      | 0.01 | 0.02        | 0.08                  | 0.87      | 0.86 | 0.12 | 0.19 | 0.81          | 0.08 | 0.40 | 0.13 | 0.04            | 0.00         | 0.75    | 0.48        | 0.57 | 0.31 | 0.39 | 0.39                   | 0.04        |
| 188 | 101814             | 0.12      | 0.11 | 0.12        | 0.23                  | 0.78      | 0.85 | 0.46 | 0.20 | 0.84          | 0.67 | 0.02 | 0.24 | 0.12            | 0.75         | 0.24    | 0.56        | 0.31 | 0.19 | 0.17 | 0.22                   | 0.08        |
| 189 | 101815             | 0.08      | 0.22 | 0.13        | 0.63                  | 0.66      | 0.92 | 0.21 | 0.15 | 0.88          | 0.28 | 0.64 | 0.05 | 0.15            | 0.71         | 0.28    | 0.51        | 0.49 | 0.28 | 0.31 | 0.34                   | 0.28        |
| 190 | 101816             | 0.00      | 0.04 | 0.01        | 0.11                  | 0.72      | 1.00 | 0.00 | 0.02 | 0.91          | 0.45 | 0.32 | 0.04 | 0.09            | 0.00         | 0.53    | 0.31        | 0.22 | 0.31 | 0.28 | 0.26                   | 0.02        |
| 191 | 101901             | 0.15      | 0.22 | 0.18        | 0.21                  | 0.83      | 0.81 | 0.47 | 0.48 | 0.87          | 0.97 | 0.22 | 0.32 | 0.55            | 0.00         | 0.58    | 0.35        | 0.40 | 0.30 | 0.44 | 0.37                   | 0.21        |
| 192 | 101902             | 0.05      | 0.06 | 0.05        | 0.02                  | 0.60      | 0.94 | 0.11 | 0.09 | 0.91          | 0.09 | 0.36 | 0.12 | 0.01            | 0.00         | 0.84    | 0.59        | 0.44 | 0.35 | 0.39 | 0.37                   | 0.06        |
| 193 | 101903             | 0.03      | 0.05 | 0.04        | 0.66                  | 0.74      | 0.96 | 0.38 | 0.07 | 0.94          | 0.09 | 0.42 | 0.12 | 0.04            | 0.41         | 0.97    | 0.88        | 0.44 | 0.35 | 0.39 | 0.37                   | 0.46        |
| 194 | 101904             | 0.25      | 0.21 | 0.22        | 0.47                  | 0.89      | 0.62 | 0.62 | 0.72 | 0.78          | 0.63 | 0.26 | 0.50 | 0.47            | 0.44         | 0.00    | 0.24        | 0.67 | 0.38 | 0.51 | 0.49                   | 0.31        |
| 195 | 101905             | 0.07      | 0.20 | 0.11        | 0.67                  | 0.67      | 0.87 | 0.63 | 0.69 | 0.92          | 0.96 | 0.34 | 0.38 | 0.66            | 0.56         | 0.91    | 0.75        | 0.33 | 0.41 | 0.34 | 0.35                   | 0.76        |
| 196 | 101906             | 0.06      | 0.03 | 0.04        | 0.78                  | 0.55      | 0.96 | 0.58 | 0.08 | 0.94          | 0.11 | 0.45 | 0.12 | 0.06            | 0.00         | 0.98    | 0.89        | 0.44 | 0.35 | 0.39 | 0.37                   | 0.56        |
| 197 | 101907             | 0.00      | 0.02 | 0.00        | 0.55                  | 0.75      | 1.00 | 0.03 | 0.00 | 0.92          | 0.17 | 1.00 | 0.03 | 0.29            | 0.00         | 0.45    | 0.23        | 0.26 | 0.52 | 0.53 | 0.41                   | 0.17        |
| 198 | 101908             | 0.04      | 0.09 | 0.05        | 0.04                  | 0.79      | 0.98 | 0.43 | 0.05 | 0.94          | 0.19 | 1.00 | 0.04 | 0.31            | 0.00         | 1.00    | 0.99        | 0.26 | 0.52 | 0.53 | 0.41                   | 0.34        |
| 199 | 102001             | 0.67      | 0.67 | 0.69        | 1.00                  | 0.47      | 0.08 | 0.86 | 0.17 | 0.11          | 0.37 | 0.06 | 0.90 | 0.42            | 0.00         | 0.00    | 0.00        | ND   | ND   | ND   | ND                     | 0.11        |
| 200 | 102002             | 0.81      | 0.91 | 0.89        | 1.00                  | 0.48      | 0.04 | 0.86 | 0.22 | 0.11          | 0.72 | 0.24 | 0.92 | 0.76            | 0.00         | 0.00    | 0.00        | ND   | ND   | ND   | ND                     | 0.35        |
| 201 | 102003             | 0.98      | 0.98 | 0.99        | 0.99                  | 0.42      | 0.00 | 0.90 | 0.19 | 0.08          | 0.84 | 0.82 | 1.00 | 0.99            | 0.00         | 0.00    | 0.00        | ND   | ND   | ND   | ND                     | 0.55        |
| 202 | 102004             | 0.77      | 0.72 | 0.75        | 0.89                  | 0.31      | 0.06 | 0.80 | 0.36 | 0.13          | 0.37 | 0.28 | 0.95 | 0.59            | 0.00         | 0.00    | 0.00        | ND   | ND   | ND   | ND                     | 0.16        |
| 203 | 102005             | 0.69      | 0.61 | 0.64        | 0.95                  | 0.47      | 0.08 | 0.82 | 0.28 | 0.13          | 0.78 | 0.69 | 0.96 | 0.96            | 0.00         | 0.00    | 0.00        | ND   | ND   | ND   | ND                     | 0.31        |
| 204 | 102101             | 0.54      | 0.62 | 0.59        | 0.88                  | 0.46      | 0.17 | 0.72 | 0.44 | 0.19          | 0.99 | 0.43 | 0.93 | 0.94            | 0.00         | 0.00    | 0.00        | ND   | ND   | ND   | ND                     | 0.23        |
| 205 | 102102             | 0.51      | 0.68 | 0.63        | 0.97                  | 0.40      | 0.18 | 0.68 | 0.49 | 0.20          | 0.87 | 0.54 | 0.91 | 0.93            | 0.39         | 0.38    | 0.25        | ND   | ND   | ND   | ND                     | 0.49        |
| 206 | 102103             | 0.47      | 0.93 | 0.85        | 0.74                  | 0.39      | 0.25 | 0.41 | 0.88 | 0.36          | 0.40 | 0.20 | 0.89 | 0.55            | 0.42         | 0.64    | 0.40        | ND   | ND   | ND   | ND                     | 0.44        |
| 207 | 102104             | 0.59      | 0.75 | 0.73        | 0.89                  | 0.46      | 0.12 | 0.77 | 0.39 | 0.15          | 0.81 | 0.50 | 0.92 | 0.90            | 0.00         | 0.00    | 0.00        | ND   | ND   | ND   | ND                     | 0.30        |
| 208 | 102105             | 0.22      | 0.33 | 0.25        | 0.92                  | 0.36      | 0.42 | 0.29 | 0.86 | 0.44          | 0.98 | 0.40 | 0.88 | 0.91            | 0.00         | 0.00    | 0.00        | ND   | ND   | ND   | ND                     | 0.20        |
| 209 | 102106             | 0.08      | 0.00 | 0.03        | 0.22                  | 0.32      | 0.57 | 0.03 | 0.98 | 0.69          | 0.55 | 0.02 | 0.73 | 0.38            | 0.80         | 1.00    | 1.00        | ND   | ND   | ND   | ND                     | 0.14        |
| 210 | 102107             | 0.30      | 0.49 | 0.39        | 0.97                  | 0.36      | 0.34 | 0.23 | 0.96 | 0.50          | 0.84 | 0.24 | 0.80 | 0.76            | 0.50         | 0.68    | 0.52        | ND   | ND   | ND   | ND                     | 0.59        |
| 211 | 102108             | 0.24      | 0.35 | 0.28        | 0.75                  | 0.87      | 0.48 | 0.25 | 0.96 | 0.64          | 0.95 | 0.31 | 0.86 | 0.86            | 0.00         | 0.00    | 0.00        | ND   | ND   | ND   | ND                     | 0.21        |
| 212 | 102109             | 0.21      | 0.19 | 0.20        | 0.18                  | 0.88      | 0.44 | 0.17 | 1.00 | 0.72          | 0.98 | 0.41 | 0.85 | 0.90            | 0.51         | 0.00    | 0.29        | 0.89 | 0.43 | 0.92 | 0.77                   | 0.55        |
| 213 | 102201             | 0.23      | 0.28 | 0.25        | 0.96                  | 0.35      | 0.39 | 0.28 | 0.89 | 0.45          | 0.41 | 0.04 | 0.81 | 0.35            | 0.54         | 0.83    | 0.67        | ND   | ND   | ND   | ND                     | 0.30        |
| 214 | 102202             | 0.49      | 0.44 | 0.44        | 0.99                  | 0.45      | 0.09 | 0.72 | 0.53 | 0.19          | 0.47 | 0.23 | 0.96 | 0.65            | 0.45         | 0.00    | 0.24        | 0.67 | 0.47 | 0.81 | 0.65                   | 0.61        |
| 215 | 102203             | 0.10      | 0.11 | 0.10        | 0.86                  | 0.35      | 0.37 | 0.23 | 0.94 | 0.50          | 0.75 | 0.17 | 0.88 | 0.73            | 0.80         | 0.62    | 0.70        | 0.28 | 0.48 | 0.43 | 0.39                   | 0.68        |
| 216 | 102204             | 0.36      | 0.28 | 0.31        | 0.70                  | 0.34      | 0.41 | 0.33 | 0.83 | 0.40          | 0.99 | 0.19 | 0.87 | 0.83            | 0.81         | 0.71    | 0.74        | 0.43 | 0.54 | 0.75 | 0.55                   | 0.80        |
| 217 | 102205             | 0.64      | 0.65 | 0.67        | 0.37                  | 0.49      | 0.08 | 0.83 | 0.27 | 0.12          | 0.80 | 0.31 | 0.87 | 0.79            | 0.64         | 0.00    | 0.42        | 0.43 | 0.54 | 0.75 | 0.55                   | 0.45        |

| No. | Standard watershed | Landscape |      |             | Stream geo-morphology | Hydrology |      |      |      | Water quality |      |      |      | Aquatic habitat |              |         |             | Biological |      |      |             | Watershed health index |
|-----|--------------------|-----------|------|-------------|-----------------------|-----------|------|------|------|---------------|------|------|------|-----------------|--------------|---------|-------------|------------|------|------|-------------|------------------------|
|     |                    | GA        | ARA  | Integration |                       | Total     | SP   | SWD  | GWD  | Integration   | Sed. | T-N  | T-P  | Integration     | Connectivity | Wetland | Integration | RDI        | BMI  | FAI  | Integration |                        |
| 218 | 102206             | 0.50      | 0.21 | 0.32        | 0.49                  | 0.51      | 0.03 | 0.81 | 0.43 | 0.14          | 0.44 | 0.61 | 0.98 | 0.82            | 0.62         | 0.35    | 0.45        | 0.70       | 0.56 | 0.83 | 0.69        | 0.45                   |
| 219 | 102207             | 0.31      | 0.10 | 0.19        | 0.14                  | 0.38      | 0.26 | 0.42 | 0.81 | 0.30          | 0.45 | 0.15 | 0.87 | 0.52            | 0.96         | 0.00    | 0.92        | 0.35       | 0.39 | 0.69 | 0.45        | 0.20                   |
| 220 | 102208             | 0.15      | 0.14 | 0.15        | 0.62                  | 0.83      | 0.56 | 0.16 | 0.93 | 0.66          | 0.48 | 0.05 | 0.53 | 0.18            | 0.95         | 0.00    | 0.91        | 0.25       | 0.23 | 0.32 | 0.25        | 0.36                   |
| 221 | 102209             | 0.32      | 0.28 | 0.29        | 0.50                  | 0.90      | 0.28 | 0.49 | 0.92 | 0.53          | 1.00 | 0.20 | 0.37 | 0.57            | 0.69         | 0.00    | 0.47        | 0.31       | 0.36 | 0.46 | 0.36        | 0.32                   |
| 222 | 102210             | 0.42      | 0.27 | 0.34        | 0.65                  | 0.91      | 0.12 | 0.58 | 0.91 | 0.48          | 0.78 | 0.28 | 0.55 | 0.59            | 0.77         | 0.34    | 0.61        | 0.58       | 0.56 | 0.83 | 0.67        | 0.70                   |
| 223 | 102211             | 0.13      | 0.13 | 0.12        | 0.46                  | 0.84      | 0.46 | 0.17 | 0.99 | 0.71          | 0.91 | 0.17 | 0.59 | 0.65            | 0.81         | 0.44    | 0.70        | 0.17       | 0.24 | 0.25 | 0.20        | 0.43                   |
| 224 | 102212             | 0.14      | 0.03 | 0.08        | 0.07                  | 0.79      | 0.56 | 0.10 | 0.94 | 0.72          | 0.65 | 0.03 | 0.48 | 0.26            | 0.72         | 0.86    | 0.72        | 0.20       | 0.24 | 0.32 | 0.24        | 0.08                   |
| 225 | 102213             | 0.42      | 0.35 | 0.38        | 0.79                  | 0.92      | 0.16 | 0.69 | 0.80 | 0.39          | 0.90 | 0.42 | 0.30 | 0.59            | 0.71         | 0.72    | 0.67        | 0.21       | 0.22 | 0.24 | 0.21        | 0.54                   |
| 226 | 102214             | 0.42      | 0.26 | 0.33        | 0.85                  | 0.33      | 0.22 | 0.64 | 0.53 | 0.22          | 0.87 | 0.75 | 0.65 | 0.92            | 0.48         | 0.58    | 0.43        | 0.42       | 0.29 | 0.33 | 0.33        | 0.56                   |
| 227 | 102215             | 0.23      | 0.38 | 0.31        | 0.09                  | 0.88      | 0.37 | 0.32 | 0.97 | 0.58          | 0.95 | 0.25 | 0.51 | 0.70            | 0.00         | 0.00    | 0.00        | 0.33       | 0.26 | 0.26 | 0.27        | 0.06                   |
| 228 | 102301             | 0.28      | 0.32 | 0.26        | 0.19                  | 0.86      | 0.43 | 0.28 | 0.95 | 0.59          | 0.89 | 0.26 | 0.59 | 0.71            | 0.50         | 0.88    | 0.68        | 0.17       | 0.18 | 0.18 | 0.17        | 0.25                   |
| 229 | 102302             | 0.10      | 0.11 | 0.09        | 0.98                  | 0.64      | 0.57 | 0.15 | 0.88 | 0.59          | 0.61 | 0.01 | 0.62 | 0.33            | 0.40         | 0.27    | 0.21        | 0.18       | 0.17 | 0.17 | 0.17        | 0.16                   |
| 230 | 102303             | 0.14      | 0.16 | 0.14        | 0.71                  | 0.65      | 0.54 | 0.08 | 0.97 | 0.68          | 0.98 | 0.11 | 0.63 | 0.70            | 0.57         | 0.00    | 0.37        | 0.27       | 0.19 | 0.17 | 0.18        | 0.38                   |
| 231 | 102304             | 0.13      | 0.17 | 0.15        | 0.36                  | 0.66      | 0.51 | 0.18 | 0.93 | 0.58          | 0.85 | 0.21 | 0.65 | 0.70            | 0.00         | 0.00    | 0.00        | ND         | ND   | ND   | ND          | 0.03                   |
| 232 | 102305             | 0.39      | 0.62 | 0.48        | 0.27                  | 0.69      | 0.14 | 0.51 | 0.91 | 0.42          | 0.54 | 0.30 | 0.97 | 0.74            | 0.67         | 0.47    | 0.53        | 0.50       | 0.25 | 0.31 | 0.33        | 0.36                   |
| 233 | 102306             | 0.20      | 0.25 | 0.20        | 0.42                  | 0.62      | 0.46 | 0.11 | 0.98 | 0.62          | 0.91 | 0.23 | 0.56 | 0.67            | 0.59         | 0.85    | 0.69        | 0.33       | 0.23 | 0.31 | 0.28        | 0.44                   |
| 234 | 102307             | 0.06      | 0.08 | 0.06        | 0.62                  | 0.59      | 0.67 | 0.06 | 0.82 | 0.64          | 0.27 | 0.01 | 0.48 | 0.07            | 0.43         | 0.87    | 0.67        | ND         | ND   | ND   | ND          | 0.07                   |
| 235 | 102308             | 0.02      | 0.04 | 0.02        | 0.90                  | 0.62      | 0.68 | 0.04 | 0.92 | 0.75          | 0.73 | 0.01 | 0.54 | 0.35            | 0.49         | 0.73    | 0.56        | ND         | ND   | ND   | ND          | 0.23                   |
| 236 | 102309             | 0.17      | 0.17 | 0.17        | 0.11                  | 0.64      | 0.51 | 0.08 | 1.00 | 0.77          | 1.00 | 0.20 | 0.65 | 0.75            | 0.00         | 0.00    | 0.00        | ND         | ND   | ND   | ND          | 0.03                   |
| 237 | 102401             | 0.07      | 0.06 | 0.06        | 0.66                  | 0.61      | 0.72 | 0.35 | 0.92 | 0.89          | 0.12 | 0.28 | 0.16 | 0.01            | 0.79         | 0.90    | 0.82        | 0.28       | 0.17 | 0.18 | 0.19        | 0.27                   |

\* GA: green area, ARA: active river area, SP: surface processes, SWD: soil water dynamics, GWD: Ground water dynamics, Sed.: sediment, and ND: no data.
