# Supplementary figures and images for: Assessment of integrated watershed health based on the natural environment, hydrology, water quality, and aquatic ecology
Source: Copernicus journal article supplement (doi:10.5194/hess-21-5583-2017), 2017-11-14

# Standard Watersheds (No.)

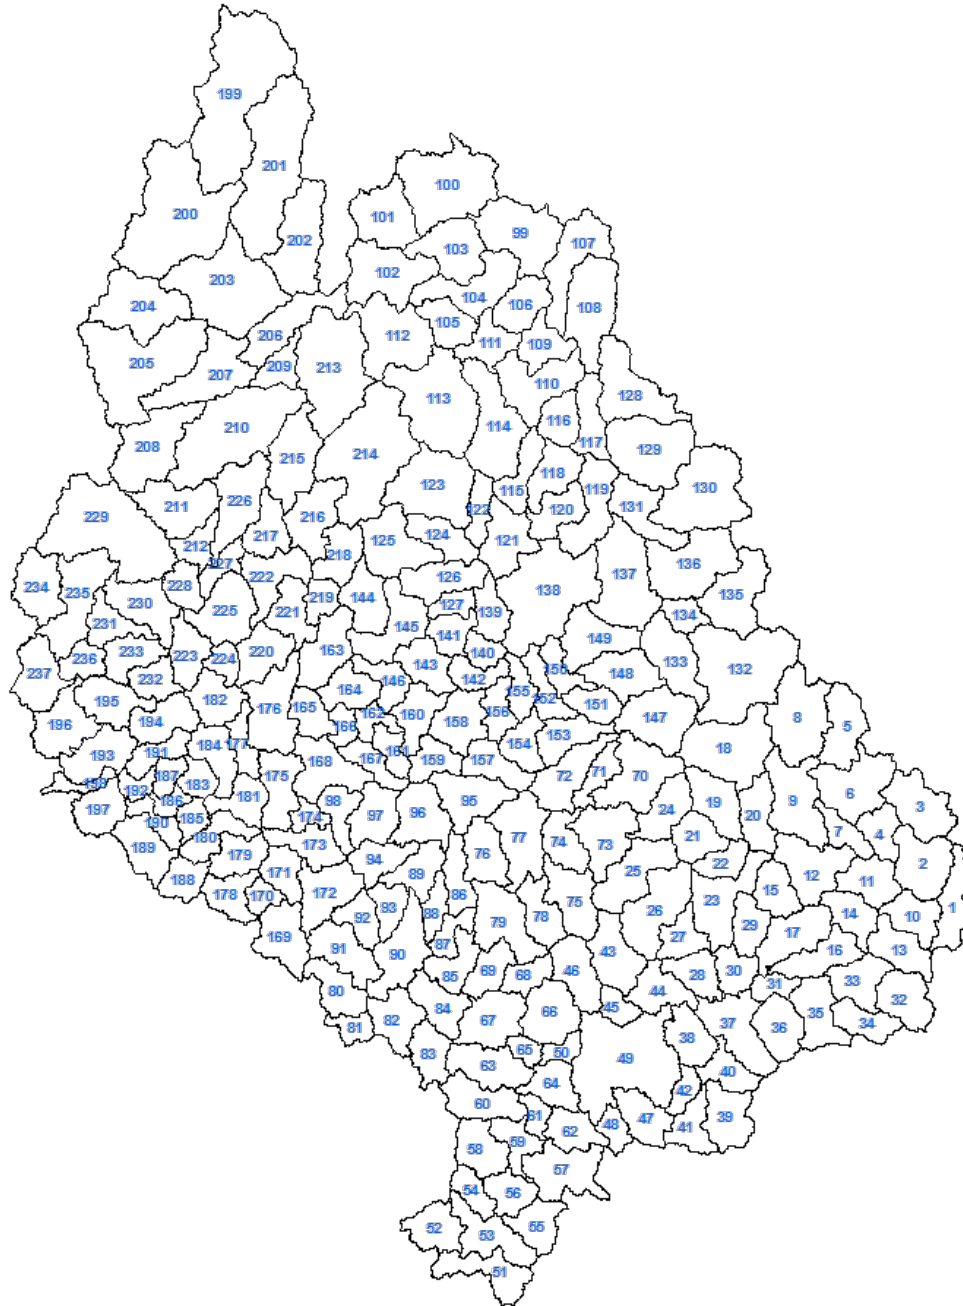

# Watershed Health Index

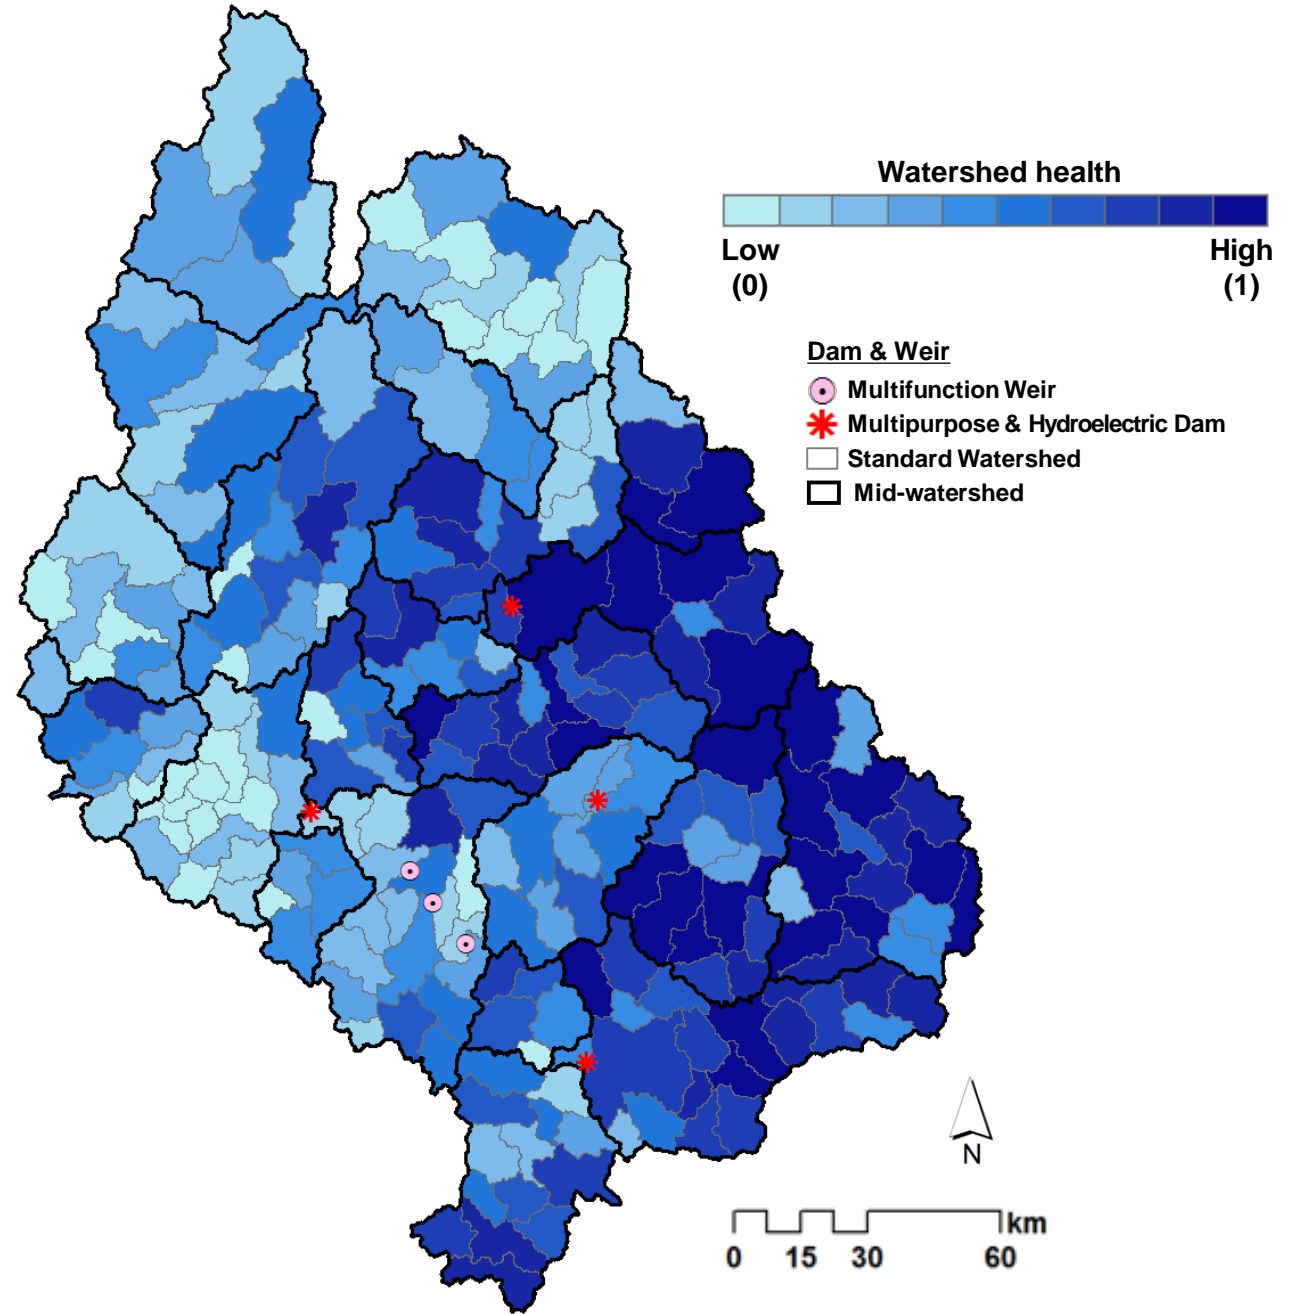

Supplement: Supplementary file 1 [file hess-21-5583-2017-supplement.zip › supplement1.pdf]
